# Supplementary material
Source: PubMed Central journal article supplement (PMC5831155)
Supplement: NIHMS942523-supplement-supp_info.pdf [file NIHMS942523-supplement-supp_info.pdf]

## Supporting Information

### NHPI-Mediated Electrochemical Iodination of Methylarenes and Comparison to Electron-Transfer-Initiated C–H Functionalization

Mohammad Rafiee, Fei Wang, Damian P. Hruszkewycz, and Shannon S. Stahl\*

Department of Chemistry, University of Wisconsin–Madison, 1101 University Avenue, Madison, WI 53706, United States

### Table of Contents

|                                                                                   |     |
|-----------------------------------------------------------------------------------|-----|
| 1. General Considerations.....                                                    | S1  |
| 2. CV study under Different Conditions .....                                      | S2  |
| 3. Evaluation of Different Radical Traps .....                                    | S3  |
| 4. Optimization of the Reaction Conditions .....                                  | S3  |
| 5. General Procedures for Electrochemical Functionalization of Methylarenes ..... | S9  |
| 6. Benzyl Pyridinium Formation.....                                               | S10 |
| 7. Compounds Characterization.....                                                | S11 |
| 8. Further Transformations of Benzyl Iodides .....                                | S17 |
| 9. NMR Spectra of the New Compounds .....                                         | S19 |
| 10. References.....                                                               | S44 |

#### 1. General Considerations.

All chemicals and solvents were purchased from commercially available sources and used without further purification. Dry solvents were obtained from a solvent purification system using columns of Al<sub>2</sub>O<sub>3</sub> under argon. <sup>1</sup>H, <sup>13</sup>C and <sup>19</sup>F NMR spectra were obtained with Bruker Avance-400 MHz with residual solvent peaks or tetramethylsilane as the internal reference. Multiplicities are described using the following abbreviations: s = singlet, bs = broad singlet, d = doublet, dd = doublet of doublet, t = triplet, m = multiplet. Chromatography was performed using an automated Biotage Isolera® with reusable 120 g or 60 g Biotage® SNAP Ultra C-18 cartridges or standard silica cartridges. High-resolution mass spectra were obtained using a Thermo Q Exactive™ Plus via (ASAP-MS) by the mass spectrometry facility at the University of Wisconsin (funded by NIH grant: 1S10OD020022-1). The supporting electrolytes (PyH<sup>+</sup>ClO<sub>4</sub><sup>-</sup> = Pyridinium Perchlorate; 2,6-LutH<sup>+</sup>ClO<sub>4</sub><sup>-</sup> = 2,6-Lutidinium Perchlorate; 2,6-DTBPYH<sup>+</sup>ClO<sub>4</sub><sup>-</sup> = 2,6-di-<sup>t</sup>BuPyridinium Perchlorate) were prepared according to the reported procedures<sup>1</sup> and dried under vacuum overnight before its usage. Voltammetric experiments were performed using a Pine potentio/galvanostat model Wavenow. Bulk electrolysis reactions were performed using a Nuvant Array PGStats, from Nuvant System Inc.

## 2. CV Study under Different Conditions

For all the voltammetric experiments, a disc electrode (2 mm diameter) and a platinum wire were used as working and counter electrodes, respectively. The working electrode potentials were measured versus Ag/AgNO<sub>3</sub> reference electrode (internal solution 0.1 M Bu<sub>4</sub>NClO<sub>4</sub> and 0.01 M AgNO<sub>3</sub> in CH<sub>3</sub>CN). The redox potential of ferrocene/ferrocenium (Fc/Fc<sup>+</sup>) was measured (under the same experimental conditions) and used to provide an internal reference potential calibration. The potential values were then adjusted relative to the Fc/Fc<sup>+</sup> potential electrochemical studies in organic solvents.

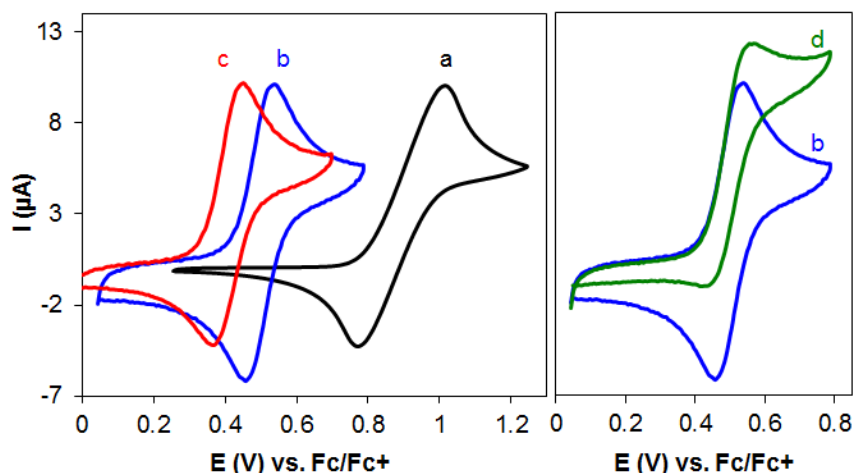

**Figure S1.** CVs of NHPI (1 mM) in acetonitrile (a); in the presence of pyridine/pyridinium perchlorate (0.1 M each) (b); pyridine (0.01 M) and solid KHCO<sub>3</sub> (100 equiv) (c); and in the presence of pyridine/pyridinium perchlorate (0.1 M each), and 4-<sup>t</sup>Bu-toluene (20 mM) (d). Other conditions: glassy carbon working electrode (~ 7.0 mm<sup>2</sup>), scan rate = 10 mV/s, and 0.1 M KPF<sub>6</sub> electrolyte for (a) and (c).

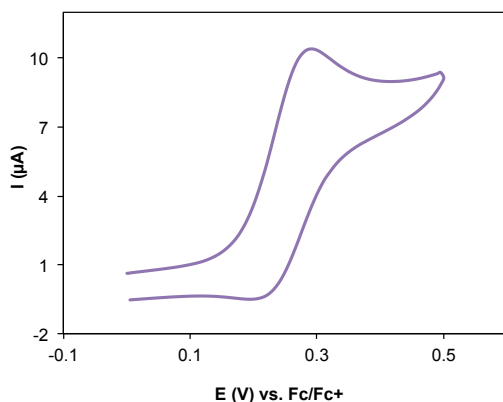

**Figure S2.** Cyclic voltammograms of NHPI (1 mM) in acetonitrile in the presence of 0.1 M tetrabutylammonium acetate at glassy carbon working electrode (~ 7.0 mm<sup>2</sup>), scan rate = 10 mV/s.

The cathodic-to-anodic peak-current ratio differs under various conditions. These results show that PINO is unstable under basic conditions.

### 3. Evaluation of Different Radical Traps

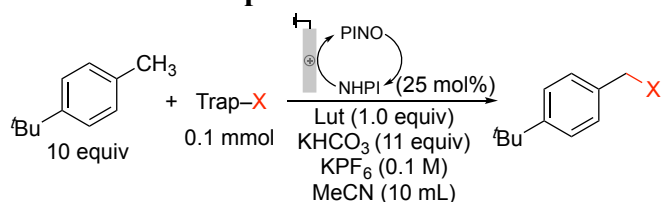

| Trap-X | PhSSPh | TsCN | TsC≡CPh | CuCl <sub>2</sub> | I <sub>2</sub> (0.5 equiv) |
|--------|--------|------|---------|-------------------|----------------------------|
| Yield  | 0%     | 0%   | 0%      | 0%                | 100%                       |

**Scheme S1.** Evaluation of different radical traps

These reactions were carried out using an H-type divided cell equipped with a reticulated vitreous carbon anode (RVC, 30 PPI, 4.0 cm x 1.0 cm x 0.6 cm, ~ 3.0 cm was immersed in the solution) and a platinum wire cathode (1.0 cm, spiral wire). In the anodic chamber, 4-<sup>t</sup>Bu-toluene (1.0 mmol, 10 equiv), NHPI (0.025 mmol, 25 mol%), Trap-X (0.1 mmol, 1.0 equiv), 2,6-Lutidine (0.1 mmol, 1.0 equiv), KHCO<sub>3</sub> (1.1 mmol, 11 equiv), KPF<sub>6</sub> (0.1 M) were dissolved in CH<sub>3</sub>CN (10.0 mL). In the cathodic chamber was placed KPF<sub>6</sub> (0.1 M) and CH<sub>3</sub>CN (10.0 mL). Constant current electrolysis (5 mA) was carried out at room temperature with magnetic stirring. The applied potential was tracked with the cutoff potential at 1.2 V vs Ag/Ag<sup>+</sup> (1.12 V vs Fc/Fc<sup>+</sup>). After that, these reactions were analyzed by <sup>1</sup>H NMR spectroscopy.

### 4. Optimization of the Reaction Conditions

a) Evaluation of currents and potentials.

Reactions were performed in a divided cell according to "Conditions A" described in section 5 below.

**Table S1.** Optimization of electrochemical parameters for bulk electrolysis

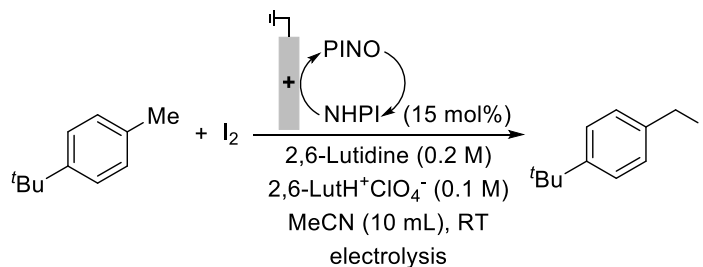

| entry | Electrolysis Condition                                                                           | Time (min) | % yield |
|-------|--------------------------------------------------------------------------------------------------|------------|---------|
| 1     | Constant potential at 0.70 V vs. Ag/Ag <sup>+</sup> (0.63 V vs Fc/Fc <sup>+</sup> ) <sup>a</sup> | 150        | 31%     |
| 2     | Constant current at 15 mA <sup>b</sup>                                                           | 130        | 28%     |
| 3     | Constant current at 10 mA <sup>b</sup>                                                           | 190        | 39%     |
| 4     | Constant current at 5 mA <sup>b</sup>                                                            | 310        | 52%     |
| 5     | Constant current at 3 mA <sup>b</sup>                                                            | 490        | 46%     |

<sup>a</sup>: This applied potential is higher than peak potential observed by cyclic voltammetry; the peak potential under these conditions was 0.55 V vs. Ag/Ag<sup>+</sup> (0.48 V vs Fc/Fc<sup>+</sup>). The initial current was 21 mA and the reaction was terminated when the current reached 1 mA. <sup>b</sup>: The reactions were terminated when the potential reached to 1.2 V vs. Ag/Ag<sup>+</sup> (1.12 V vs Fc/Fc<sup>+</sup>).

b) Testing of undivided cell configuration.

The reaction conditions defined in entry 4 of Table S1 were tested in a ca. 15 mL undivided cell. Considerably lower yields were obtained: 16% and 19% product after 480 and 600 minutes, respectively. The poor results are rationalized by facile redox cycling of the  $I_2/I^-$  redox couple at the anode and cathode, which limits productive use of current.

c) Effect of supporting electrolyte

Different anions, including  $ClO_4^-$ ,  $PF_6^-$  and  $BF_4^-$  were examined as the counterion of 2,6-lutidinium for bulk electrolysis reactions. NMR yields were similar for each of these counterions.

**Caution:** organic perchlorate salts can be explosive.

**Table S2.** Evaluation of catalyst and iodine loading

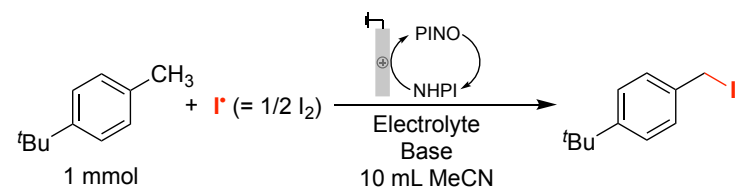

| entry | NHPI (mol%) | Base (equiv) | Electrolyte (equiv) <sup>a</sup> | I• (equiv) | % yield |
|-------|-------------|--------------|----------------------------------|------------|---------|
| 1     | 20%         | Lut (1.5)    | [LutH]ClO <sub>4</sub> (1.0)     | 1.0        | 57      |
| 2     | 20%         | Lut (1.5)    | [LutH]PF <sub>6</sub> (1.0)      | 1.0        | 55      |
| 3     | 20%         | Lut (1.5)    | [LutH]BF <sub>4</sub> (1.0)      | 1.0        | 54      |

The cationic portion of the electrolyte also has an influence on the reaction. For example, use of 2,6-DTBPYH<sup>+</sup>ClO<sub>4</sub><sup>-</sup> instead of LutH<sup>+</sup>ClO<sub>4</sub><sup>-</sup> as the supporting electrolyte resulted in higher yields for some of the substrates. Lutidinium can displace iodide from some of the benzylic iodide products, and lutidine can undergo iodination of the benzylic methyl groups under the reaction conditions. For example, Figure S3 shows the formation of benzylutidinium and the iodination product of lutidine during the iodination reaction of 4-chlorotoluene. Figure S4 shows a crude NMR spectrum from an electrolysis reaction under Conditions A (see section 5, below) in the absence of a methylarene substrate, but containing 0.3 M 2,6-lutidine.

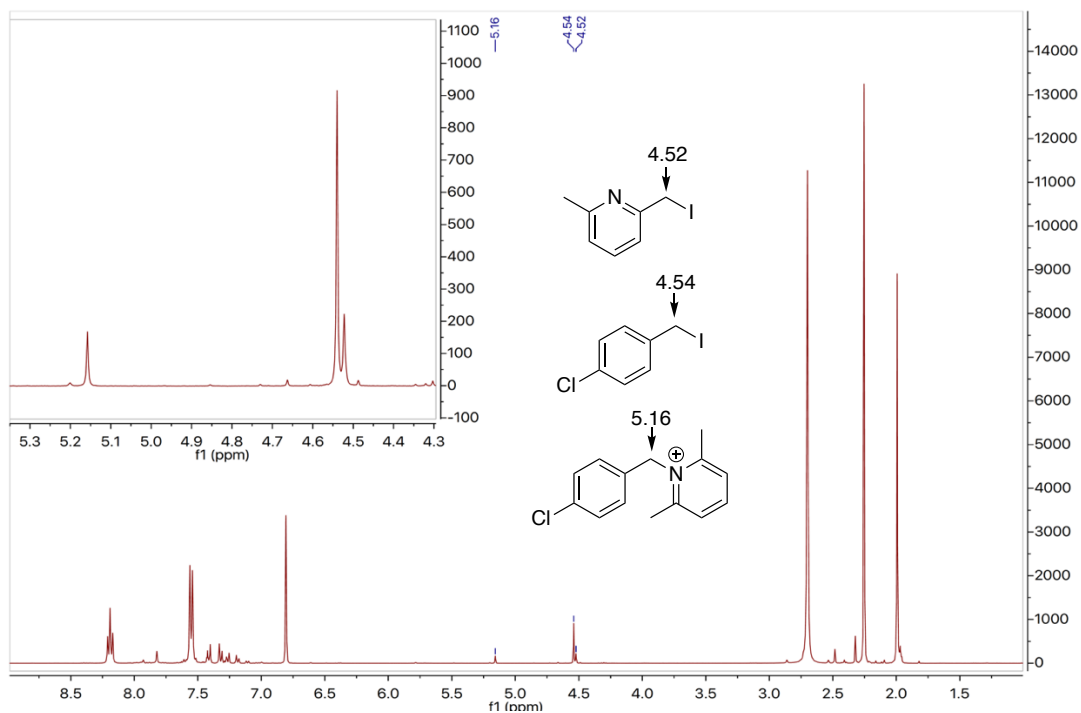

**Figure S3.** Crude NMR spectrum obtained from the reaction mixture for iodination of 4-chlorotoluene under Conditions A.

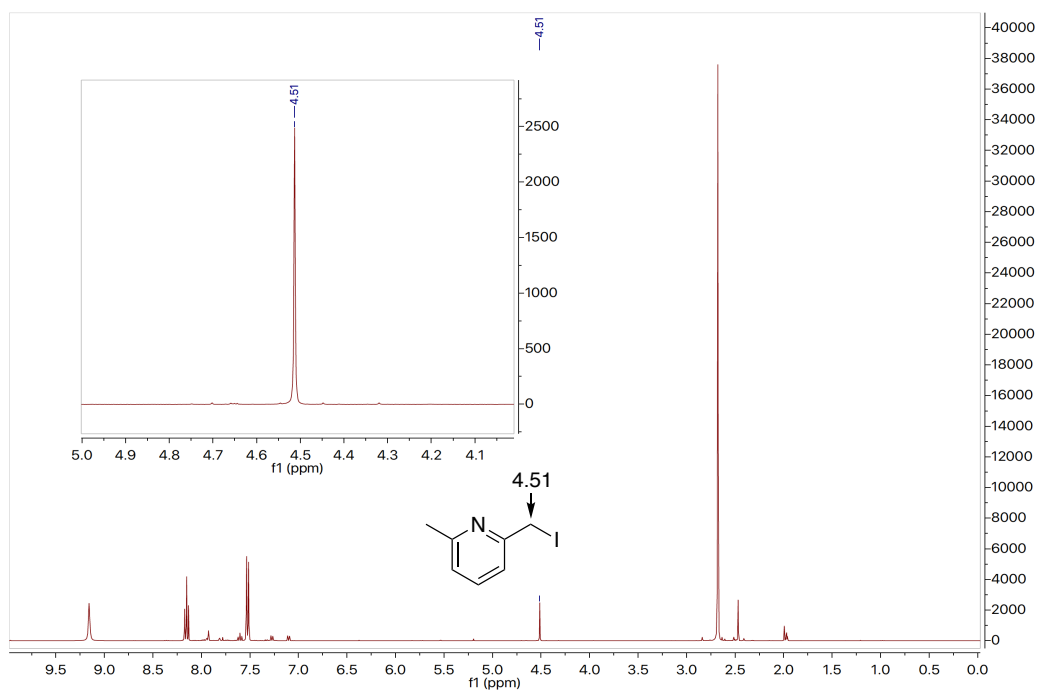

**Figure S4.** Crude NMR spectrum obtained from the reaction mixture under Conditions A in absence of a methylene substrate, but containing 0.3 M 2,6-lutidine.

d) Effect of base (see also, Table 1 of the manuscript, for additional data)

**Table S3.** Evaluation of catalyst and iodine loading

Reaction scheme showing the electrocatalytic iodination of **1a** (4-*t*-Bu-C<sub>6</sub>H<sub>4</sub>-CH<sub>3</sub>) using I<sup>•</sup> (from 1/2 I<sub>2</sub>) in the presence of a catalyst (NHPI/PINO) and an electrolyte (KPF<sub>6</sub>) in MeCN with a base. The product is 4-*t*-Bu-C<sub>6</sub>H<sub>4</sub>-CH<sub>2</sub>I.

| entry | NHPI (mol%) | Base (equiv)                      | Electrolyte      | I <sup>•</sup> (equiv) | % yield vs ArCH <sub>3</sub> (vs I <sup>•</sup> ) |
|-------|-------------|-----------------------------------|------------------|------------------------|---------------------------------------------------|
| 1     | 2.5%        | Lut, KHCO <sub>3</sub> (0.1, 1.1) | KPF <sub>6</sub> | 0.1                    | 10 (100)                                          |
| 2     | 2.5%        | Lut, KHCO <sub>3</sub> (0.1, 1.1) | KPF <sub>6</sub> | 0.3                    | 26 (86)                                           |
| 3     | 7.5%        | Lut, KHCO <sub>3</sub> (0.1, 1.1) | KPF <sub>6</sub> | 0.3                    | 28 (92)                                           |
| 4     | 7.5%        | Lut, KHCO <sub>3</sub> (0.1, 3.3) | KPF <sub>6</sub> | 0.5                    | 36 (72)                                           |
| 5     | 15%         | Lut, KHCO <sub>3</sub> (0.1, 3.3) | KPF <sub>6</sub> | 1.0                    | 38 (38)                                           |

e) Effect of Electrode Material

Voltammetric study of the NHPI and metharene oxidation were studied using different electrode materials. CVs of 4-chlorotoluene are shown in Figure S5. Glassy carbon was used as the electrode for further voltammetric studies and bulk electrolysis reactions (RVC). The observed redox potentials are comparable to those reported in the literature.<sup>2, 3</sup>

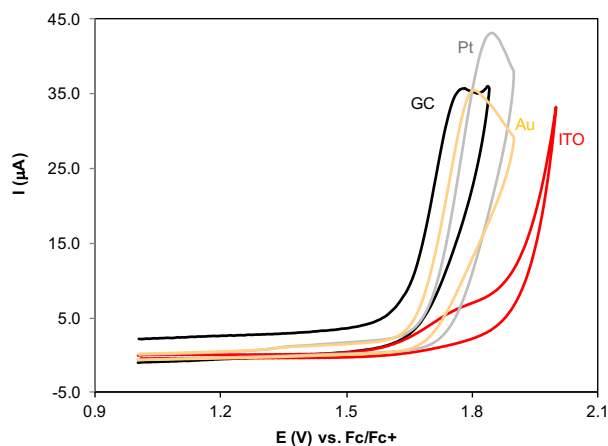

**Figure S5.** CVs of 4-chlorotoluene in acetonitrile and in the presence of pyridine/pyridinium perchlorate (0.1 M each) at the surface of Glassy Carbon (GC), Platinum (Pt), Gold (Au) and Indium Tin Oxide (ITO). Scan rate 10 mVs<sup>-1</sup>, electrode surface area ~ 7.0 mm<sup>2</sup>.

### f) Evaluation of mediators

Voltammetry and chronoamperometry were used after bulk electrolysis to probe the stability of different imidoxyl radicals. Figure S6 shows the voltammograms of NHPI and Cl<sub>4</sub>NHPI before and after a 10 min bulk electrolysis, recorded using a rotating disc electrode (the current is proportional to the bulk concentration of electroactive species). These results show that concentration of PINO (Figure S6-A) is higher than Cl<sub>4</sub>PINO (Figure S6-B), and are indicative of the higher stability of PINO under these conditions. When NHSI was subjected to the same conditions, no reduction current was detected after bulk electrolysis, demonstrating the instability of SINO.

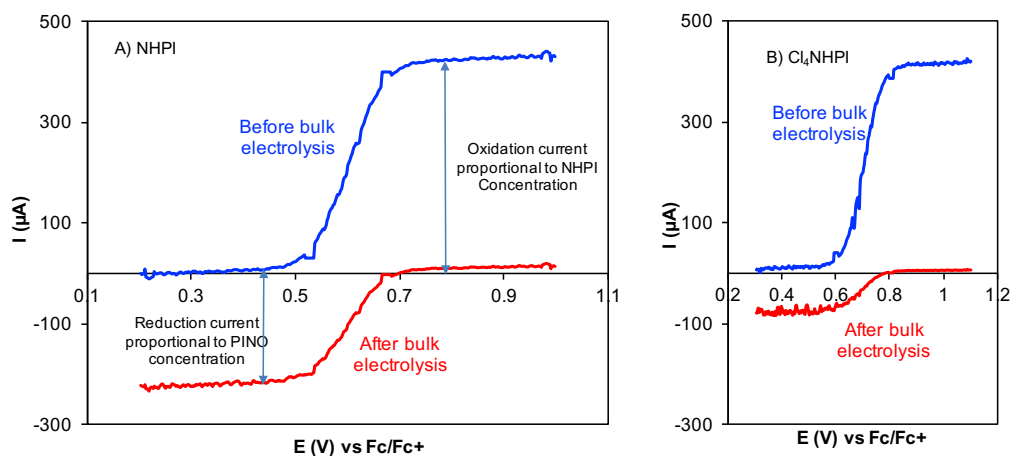

**Figure S6.** Linear sweep voltammograms of NHPI (A) and Cl<sub>4</sub>NHPI (B) before and after bulk electrolysis. reaction condition: 5 mM of each catalyst in MeCN including 0.1 M Py, 0.1 M PyH<sup>+</sup>ClO<sub>4</sub><sup>-</sup>. Glassy carbon electrode (~ 7.0 mm<sup>2</sup>), rotation rate: 500 rpm.

Chronoamperometry was used to probe the stability of imidoxyl species generated by electrolysis by measuring the cathodic current at constant potential (0.22 V vs Fc/Fc<sup>+</sup>; cf. Figure S6). The time courses reveal the half-life of PINO is ~ 4 min, while Cl<sub>4</sub>PINO is ~ 40 s.

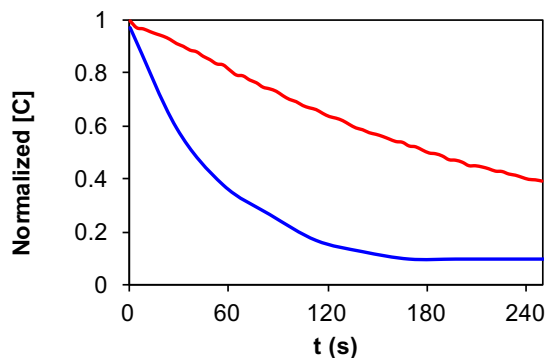

**Figure S7.** Concentration profiles of PINO (electrochemically generated from NHPI) (red) and Cl<sub>4</sub>PINO (electrochemically generated from Cl<sub>4</sub>NHPI) (blue). The currents are normalized based on the initial concentration of PINO after bulk electrolysis.

The reactivity of these mediators was also evaluated by bulk electrolysis with 2-bromotoluene as the substrate, in which NHPI lasted 2 and 4 h longer than Cl<sub>4</sub>NHPI and NHSI respectively and gave the best yield (68%). The yields with NHSI and Cl<sub>4</sub>NHPI were only 28% and 51% with a significant amount of starting material intact.

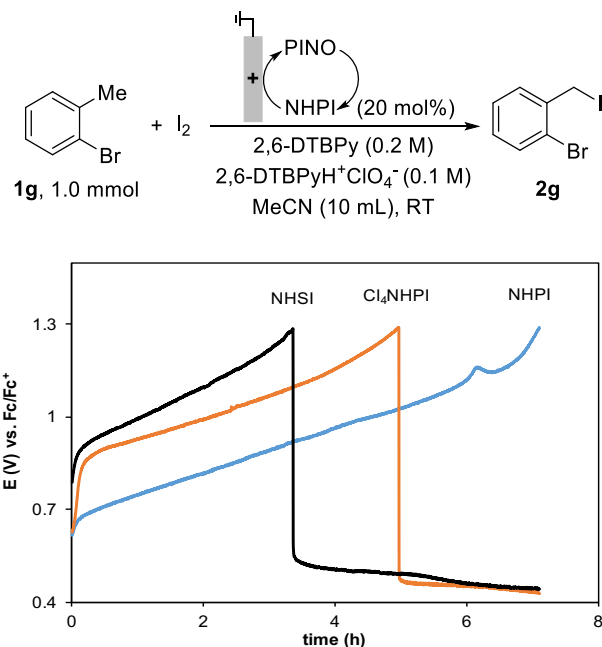

**Figure S8.** Bulk electrolysis plots for iodination of 2-bromotoluene catalyzed by NHPI, Cl<sub>4</sub>NHPI and NHSI. Reaction conditions: anodic compartment: 0.1 M 2-bromotoluene, 20 mol% catalyst, 50 mol% I<sub>2</sub>, 0.2 M 2,6-DTBPY, 0.1 M 2,6-DTBPYH<sup>+</sup>ClO<sub>4</sub><sup>-</sup>, 10 mL MeCN, 5 mA; cathodic compartment: 0.2 M 2,6-DTBPYH<sup>+</sup>ClO<sub>4</sub><sup>-</sup> in 10 mL MeCN.

g) The effect of supporting electrolyte of cathodic compartment.

Figure S9 depicts the anodic reaction (generation of PINO and LutH<sup>+</sup>), cathodic reaction (H<sub>2</sub> evolution and consumption of LutH<sup>+</sup>) and ion transfer through the membrane during bulk electrolysis.

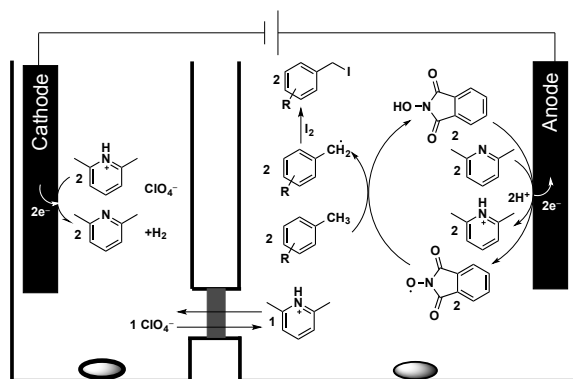

**Figure S9.** Schematic presentation of anodic and cathodic reactions for the divided electrochemical cell.



## 5. General Procedures for Electrochemical Functionalization of Methylarenes: Iodination of Methylarenes

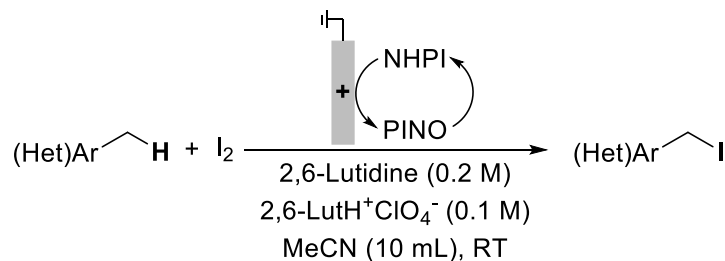

**Conditions A:** The reaction was carried out using an H-type divided cell (see Figure S10) equipped with a reticulated vitreous carbon anode (RVC, 30 PPI, 4.0 cm x 1.0 cm x 0.6 cm, ~ 3.0 cm was immersed in the solution) and a platinum wire cathode (1.0 cm, spiral wire). In the anodic chamber, methylarene (1.0 mmol), NHPI (0.2 mmol, 20 mol%), I<sub>2</sub> (0.50 mmol, 50 mol%), 2,6-lutidine (2.0 mmol, 0.2 M) and 2,6-LutH<sup>+</sup>ClO<sub>4</sub><sup>-</sup> (1.0 mmol, 0.1 M) were dissolved in CH<sub>3</sub>CN (10.0 mL). In the cathodic chamber was placed 2,6-LutH<sup>+</sup>ClO<sub>4</sub><sup>-</sup> (2.0 mmol, 0.2 M) and CH<sub>3</sub>CN (10.0 mL). Constant current electrolysis (5 mA/mmol) was carried out at room temperature with magnetic stirring. The reactions were terminated when the potentials reached 1.20 V vs. Ag/Ag<sup>+</sup> (1.12 V vs Fc/Fc<sup>+</sup>) (This cutoff potential corresponds to the lowest redox potential at which one of the methylarene could undergo direct electron transfer). The average reaction time was 7 h for the substrates listed in substrate scope table. The solvent from both cell compartments was removed under vacuum, and the residue was purified by column chromatography on silica gel with a gradient eluent of pentane and ethyl acetate to give the product.

**Conditions B:** The reaction was carried out using an H-type divided cell equipped with a reticulated vitreous carbon anode (RVC, 30 PPI, 4.0 cm x 1.0 cm x 0.6 cm, ~ 3.0 cm was immersed in the solution) and a platinum wire cathode (1.0 cm, spiral wire). In the anodic chamber, methylarene (1.0 mmol), NHPI (0.2 mmol, 20 mol%), I<sub>2</sub> (0.50 mmol, 50 mol%), 2,6-di-<sup>t</sup>BuPyridine (2.0 mmol, 0.2 M) and 2,6-DTBPpyH<sup>+</sup>ClO<sub>4</sub><sup>-</sup> (1.0 mmol, 0.1 M) were dissolved in CH<sub>3</sub>CN (10.0 mL). In the cathodic chamber was placed 2,6-DTBPpyH<sup>+</sup>ClO<sub>4</sub><sup>-</sup> (2.0 mmol, 0.2 M) and CH<sub>3</sub>CN (10.0 mL). Constant current electrolysis (5 mA/mmol) was carried out at room temperature with magnetic stirring. The reactions were terminated when the potentials reached to 1.20 V vs. Ag/Ag<sup>+</sup> (1.12 V vs Fc/Fc<sup>+</sup>). The average reaction time was 7 hours for the substrates listed in substrate scope table. The solvent from both cell compartments was removed under vacuum, and the residue was purified by column chromatography on silica gel with a gradient eluent of pentane and ethyl acetate to give the product.

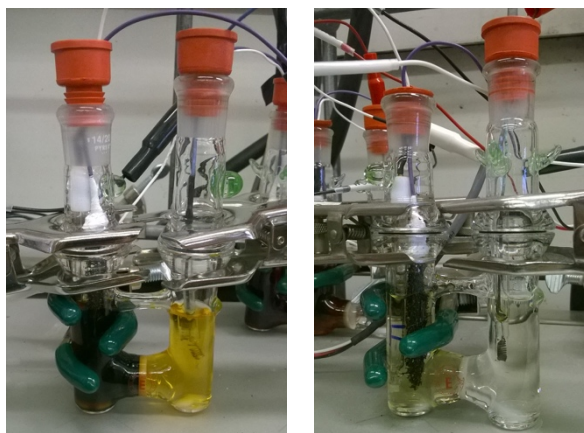

**Figure S10.** H-type divided cell for electrolysis. Left: before bulk electrolysis; Right: after bulk electrolysis.

## 6. Benzyl Pyridinium Formation

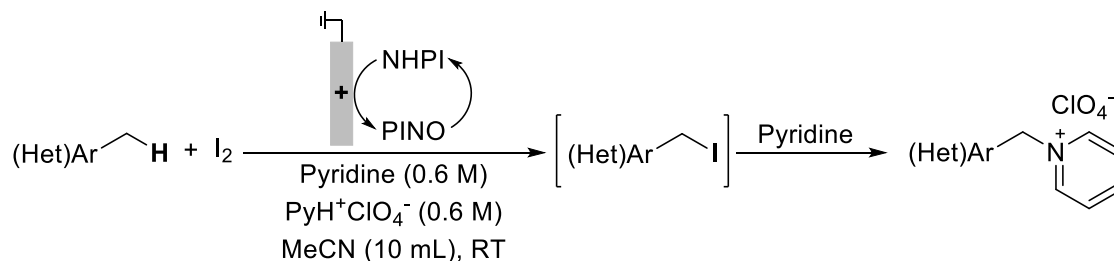

The reaction was carried out using an H-type divided cell equipped with a reticulated vitreous carbon anode (RVC, 30 PPI, 4.0 cm x 1.0 cm x 0.6 cm, ~ 3.0 cm was immersed in the solution) and a platinum wire cathode (1.0 cm, spiral wire). In the anodic chamber, methylarene (3.0 mmol), NHPI (0.45 mmol, 15 mol%), I<sub>2</sub> (0.06 mmol, 20 mol%), Pyridine (6.0 mmol, 0.6 M) and PyH<sup>+</sup>ClO<sub>4</sub><sup>-</sup> (6.0 mmol, 0.6 M) were dissolved in CH<sub>3</sub>CN (10.0 mL). In the cathodic chamber were placed PyH<sup>+</sup>ClO<sub>4</sub><sup>-</sup> (6.0 mmol, 0.6 M) and CH<sub>3</sub>CN (10.0 mL). Constant current electrolysis (15.0 mA, 5 mA/mmol) was carried out at room temperature with magnetic stirring. The reactions were terminated when the potentials reached to 1.20 V vs. Ag/Ag<sup>+</sup> (1.12 V vs Fc/Fc<sup>+</sup>). The average reaction time was 16 hours for the substrates listed in substrate scope table. After 16 hours, the solvent from both cell compartments was removed under vacuum, then the residue was dissolved in ethyl acetate and washed with saturated Na<sub>2</sub>S<sub>2</sub>O<sub>3</sub> to remove the remaining iodine, followed by washing twice with aqueous HClO<sub>4</sub> (0.3 M) to remove excess pyridine/pyridinium electrolyte. The organic layer was then concentrated to afford the crude product, which was then washed with toluene twice, and dried overnight under vacuum to give the pure product.

**CAUTION:** The mixture of organic compounds with perchlorate is potentially explosive. For larger scale applications, the use of PF<sub>6</sub><sup>-</sup> salts is recommended. Crude and isolated yields of the 3-methoxybenzyl pyridinium PF<sub>6</sub><sup>-</sup> salt were within 5% of those reported for the corresponding perchlorate salt, when Py/PyH<sup>+</sup>PF<sub>6</sub><sup>-</sup> was used as the electrolyte.

## 7. Compounds Characterization

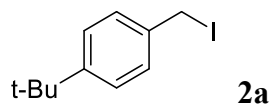

The reaction was conducted following conditions A.

NMR yield: 57%

Spectra Available in the Literature: Yes<sup>4</sup>

<sup>1</sup>H NMR (400 MHz, CDCl<sub>3</sub>) δ 7.32 (s, 4H), 4.46 (s, 2H), 1.31 (s, 9H).

<sup>13</sup>C NMR (100 MHz, CDCl<sub>3</sub>) δ 151.0, 136.1, 128.4, 125.8, 34.6, 31.2, 6.0.

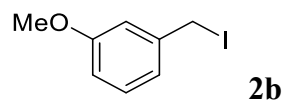

The reaction was conducted following conditions A.

NMR yield: 83%; Isolated yield: 78% (194 mg, light yellow viscous liquid)

Spectra Available in the Literature: Yes<sup>5</sup>

<sup>1</sup>H NMR (400 MHz, CDCl<sub>3</sub>) δ 7.21 (t, *J* = 8.0 Hz, 1H), 6.97 (d, *J* = 8.0 Hz, 1H), 6.92 – 6.90 (m, 1H), 6.79 (dd, *J* = 8.0, 2.0 Hz, 1H), 4.43 (s, 2H), 3.81 (s, 3H).

<sup>13</sup>C NMR (100 MHz, CDCl<sub>3</sub>) δ 159.6, 140.6, 129.8, 121.0, 114.1, 113.6, 55.2, 5.6.

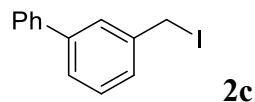

The reaction was conducted following conditions A.

NMR yield: 71%

Spectra Available in the Literature: No

<sup>1</sup>H NMR (400 MHz, CDCl<sub>3</sub>) δ 7.60 – 7.51 (m, 3H), 7.46 – 7.37 (m, 3H), 7.36 – 7.27 (m, 3H), 4.46 (s, 2H).

<sup>13</sup>C NMR (100 MHz, CDCl<sub>3</sub>) δ 141.8, 140.5, 139.7, 129.2, 128.8, 127.54, 127.51, 127.49, 127.1, 126.7, 5.6.

HRMS (ESI) Calculated for C<sub>13</sub>H<sub>12</sub>I ([M+H]<sup>+</sup>): 294.9978, measured: 294.9975.

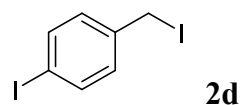

The reaction was conducted following conditions A.

NMR yield: 69%

Spectra Available in the Literature: Yes<sup>6</sup>

<sup>1</sup>H NMR (400 MHz, CDCl<sub>3</sub>) δ 7.62 (d, *J* = 8.4 Hz, 2H), 7.12 (d, *J* = 8.4 Hz, 2H), 4.38 (s, 2H).

<sup>13</sup>C NMR (100 MHz, CDCl<sub>3</sub>) δ 138.9, 137.9, 130.5, 93.3, 4.3.

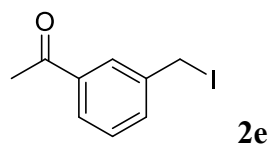

The reaction was conducted following conditions B.

NMR yield: 57%

When the reaction was conducted using conditions A, the NMR yield was 51%.

Spectra Available in the Literature: Yes<sup>7</sup>

**<sup>1</sup>H NMR** (400 MHz, CDCl<sub>3</sub>) δ 7.95 (s, 1H), 7.82 (d, *J* = 7.8 Hz, 1H), 7.57 (d, *J* = 7.7 Hz, 1H), 7.39 (t, *J* = 7.7 Hz, 1H), 4.48 (s, 2H), 2.59 (s, 3H).

**<sup>13</sup>C NMR** (100 MHz, CDCl<sub>3</sub>) δ 197.4, 140.0, 137.5, 133.3, 129.1, 128.2, 127.7, 26.6, 4.2.

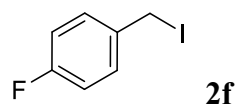

The reaction was conducted following conditions B.

NMR yield: 68%; Isolated yield: 62% (147 mg, light yellow solid); the NMR yield was 56% under conditions A.

Spectra Available in the Literature: Yes<sup>8</sup>

**<sup>1</sup>H NMR** (400 MHz, CDCl<sub>3</sub>) δ 7.40 – 7.31 (m, 2H), 7.04 – 6.93 (m, 2H), 4.44 (s, 2H).

**<sup>13</sup>C NMR** (100 MHz, CDCl<sub>3</sub>) δ 162.1 (d, *J* = 246.4 Hz), 135.2 (d, *J* = 3.4 Hz), 130.4 (d, *J* = 8.6 Hz), 115.8 (d, *J* = 21.5 Hz), 4.5.

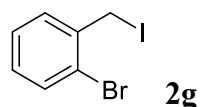

The reaction was conducted following conditions B.

NMR yield: 69%; isolated yield 68%, (201 mg, brown oil); the NMR yield was 58% under conditions A.

Spectra Available in the Literature: Yes<sup>7</sup>

**<sup>1</sup>H NMR** (400 MHz, CDCl<sub>3</sub>) δ 7.51 (dd, *J* = 8.0, 1.2 Hz, 1H), 7.42 (dd, *J* = 7.6, 1.6 Hz, 1H), 7.24 (td, *J* = 7.6, 1.2 Hz, 1H), 7.10 (td, *J* = 8.0, 1.6 Hz, 1H), 4.53 (s, 2H).

**<sup>13</sup>C NMR** (100 MHz, CDCl<sub>3</sub>) δ 138.3, 133.5, 130.6, 129.5, 128.0, 124.1, 5.8.

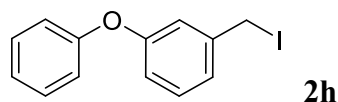

The reaction was conducted following conditions B.

NMR Yield: 70%; Isolated yield 67% (207 mg, light red oil); the NMR yield was 56% under conditions A.

Spectra Available in the Literature: No

**<sup>1</sup>H NMR** (400 MHz, CDCl<sub>3</sub>) δ 7.39 – 7.31 (m, 2H), 7.24 (t, *J* = 8.0 Hz, 1H), 7.16 – 7.07 (m, 2H), 7.05 – 6.96 (m, 3H), 6.86 (dd, *J* = 8.4, 2.0 Hz, 1H), 4.39 (s, 2H).

**<sup>13</sup>C NMR** (100 MHz, CDCl<sub>3</sub>) δ 157.5, 156.7, 141.1, 130.1, 129.8, 123.5, 123.4, 119.0, 118.8, 118.1, 4.8.

**HRMS (ESI)** Calculated for C<sub>13</sub>H<sub>12</sub>OI ([M+H]<sup>+</sup>): 310.9927, measured: 310.9921.

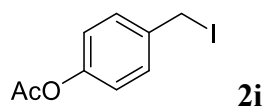

The reaction was conducted following conditions A.

NMR yield: 40%; isolated yield 36% (99 mg white solid)

Spectra Available in the Literature: Yes<sup>7</sup>

**<sup>1</sup>H NMR** (500 MHz, CDCl<sub>3</sub>) δ 7.39 (d, *J* = 8.4 Hz, 2H), 7.02 (d, *J* = 8.4 Hz, 2H), 4.44 (s, 2H), 2.29 (s, 3H)

**<sup>13</sup>C NMR** (125 MHz, CDCl<sub>3</sub>) δ 168.2, 150.0, 135.8, 128.9, 120.9, 20.1, 3.5.

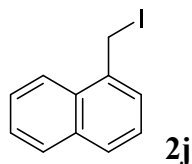

The reaction was conducted following conditions A.

NMR yield: 77%

Spectra Available in the Literature: No.

This compound decomposed during MS characterization.

**<sup>1</sup>H NMR** (400 MHz, CDCl<sub>3</sub>) δ 7.81 – 7.70 (m, 4H), 7.46 – 7.40 (m, 3H), 4.58 (s, 2H).

**<sup>13</sup>C NMR** (100 MHz, CDCl<sub>3</sub>) δ 136.5, 133.2, 132.7, 128.7, 127.8, 127.7, 127.0, 126.9, 126.4, 126.3, 6.5.

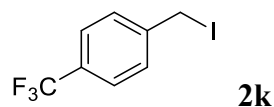

The reaction was conducted following conditions A.

NMR yield: 39%

Spectra Available in the Literature: Yes<sup>9</sup>

**<sup>1</sup>H NMR** (400 MHz, CDCl<sub>3</sub>) δ 7.56 (d, *J* = 8.4 Hz, 1H), 7.48 (d, *J* = 8.4 Hz, 1H), 4.46 (s, 1H).

**<sup>13</sup>C NMR** (100 MHz, CDCl<sub>3</sub>) δ 143.3 (q, *J* = 1.3 Hz), 129.9 (q, *J* = 32.6 Hz), 129.0, 125.8 (q, *J* = 3.8 Hz), 123.9 (q, *J* = 272.1 Hz), 3.2.

**<sup>19</sup>F NMR** (377 MHz, CDCl<sub>3</sub>) δ -62.68 (s).

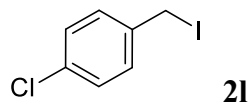

The reaction was conducted following conditions B.

NMR yield: 67%; the NMR yield was 61% under conditions A.

Spectra Available in the Literature: Yes<sup>9</sup>

**<sup>1</sup>H NMR** (400 MHz, CDCl<sub>3</sub>) δ 7.30 (d, *J* = 8.4 Hz, 2H), 7.25 (d, *J* = 8.4 Hz, 2H), 4.41 (s, 2H).

**<sup>13</sup>C NMR** (100 MHz, CDCl<sub>3</sub>) δ 137.8, 133.6, 130.0, 129.0, 4.2.

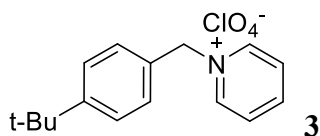

The reaction was conducted following the general procedure for benzyl pyridinium formation.

NMR yield: 89%; isolated yield 81% (792 mg, light yellow solid)

Spectra Available in the Literature: No

**<sup>1</sup>H NMR** (400 MHz, CD<sub>3</sub>CN) δ 8.78 (d, *J* = 5.2 Hz, 2H), 8.51 (t, *J* = 7.2 Hz, 1H), 8.03 (t, *J* = 7.2 Hz, 2H), 7.50 (d, *J* = 7.6 Hz, 2H), 7.39 (d, *J* = 7.6 Hz, 2H), 5.70 (s, 2H), 1.28 (s, 9H).

**<sup>13</sup>C NMR** (100 MHz, CD<sub>3</sub>CN) δ 154.1, 147.1, 145.4, 131.1, 129.9, 129.6, 127.4, 65.1, 35.4, 31.3.

**HRMS (ESI)** Calculated for C<sub>16</sub>H<sub>20</sub>N<sup>+</sup> (M-ClO<sub>4</sub><sup>-</sup>): 226.1590, measured: 226.1592.

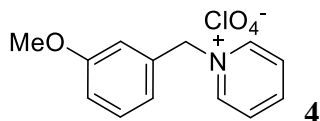

The reaction was conducted following the general procedure for benzyl pyridinium formation.

NMR yield: 93%; isolated yield 83% (747 mg, light yellow solid)

Spectra Available in the Literature: No

**<sup>1</sup>H NMR** (400 MHz, CD<sub>3</sub>CN) δ 8.81 (d, *J* = 5.6 Hz, 2H), 8.54 (t, *J* = 7.6 Hz, 1H), 8.06 (t, *J* = 6.4 Hz, 2H), 7.41 (t, *J* = 7.6 Hz, 1H), 7.10 – 6.99 (m, 3H), 5.71 (s, 2H), 3.82 (s, 3H).

**<sup>13</sup>C NMR** (100 MHz, CD<sub>3</sub>CN) δ 161.4, 147.3, 145.6, 135.3, 131.8, 129.6, 122.3, 116.4, 115.8, 65.4, 56.2.

**HRMS (ESI)** Calculated for C<sub>13</sub>H<sub>14</sub>NO<sup>+</sup> (M-ClO<sub>4</sub><sup>-</sup>): 200.1070, measured: 200.1069.

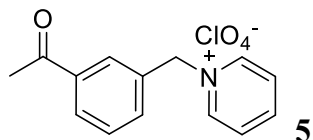

The reaction was conducted following the general procedure for benzyl pyridinium formation.

NMR yield: 62%; isolated yield 53% (496 mg, light yellow solid)

Spectra Available in the Literature: No

**<sup>1</sup>H NMR** (400 MHz, CD<sub>3</sub>CN) δ 8.84 (d, *J* = 5.6 Hz, 2H), 8.52 (t, *J* = 7.6 Hz, 1H), 8.10 (s, 1H), 8.05 – 7.97 (m, 3H), 7.71 (d, *J* = 7.6 Hz, 1H), 7.56 (t, *J* = 7.6 Hz, 1H), 5.81 (s, 2H), 2.58 (s, 3H).  
**<sup>13</sup>C NMR** (100 MHz, CD<sub>3</sub>CN) δ 200.5, 146.8, 145.0, 138.2, 134.6, 133.9, 130.4, 130.1, 130.0, 129.1, 64.3, 26.9.

**HRMS (ESI)** Calculated for C<sub>14</sub>H<sub>14</sub>NO<sup>+</sup> (M-ClO<sub>4</sub><sup>-</sup>): 212.1070, measured: 212.1069.

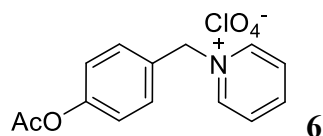

The reaction was conducted following the general procedure for benzyl pyridinium formation.

NMR yield: 40%

Spectra Available in the Literature: No

The product decomposed during purification. Therefore, the crude NMR spectrum is provided below.

**HRMS (ESI)** Calculated for C<sub>14</sub>H<sub>14</sub>NO<sub>2</sub><sup>+</sup> (M-ClO<sub>4</sub><sup>-</sup>): 228.1019, measured: 228.1020.

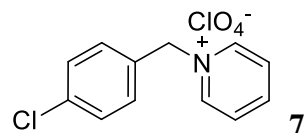

The reaction was conducted following the general procedure for benzyl pyridinium formation.

NMR yield: 84%

Spectra Available in the Literature: Yes<sup>10</sup>

**<sup>1</sup>H NMR** (400 MHz, CD<sub>3</sub>CN) δ 8.79 (d, *J* = 5.6 Hz, 2H), 8.57 – 8.47 (m, 1H), 8.07 – 7.98 (m, 2H), 7.48 – 7.39 (m, 4H), 5.73 (s, 2H).

**<sup>13</sup>C NMR** (100 MHz, CD<sub>3</sub>CN) δ 146.8, 144.9, 135.6, 132.3, 131.6, 129.9, 129.1, 63.9.

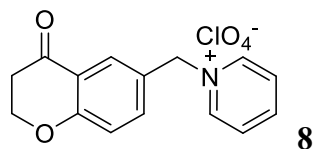

The reaction was conducted following the general procedure for benzyl pyridinium formation.

NMR yield: 90%; isolated yield 74% (251 mg, light yellow solid)

Spectra Available in the Literature: No

**<sup>1</sup>H NMR** (400 MHz, CD<sub>3</sub>CN) δ 8.75 (d, *J* = 5.6 Hz, 2H), 8.50 (t, *J* = 7.6 Hz, 1H), 8.01 (t, *J* = 7.2 Hz, 2H), 7.95 (d, *J* = 2.4 Hz, 1H), 7.59 (dd, *J* = 8.6, 2.4 Hz, 1H), 7.08 (d, *J* = 8.6 Hz, 1H), 5.68 (s, 2H), 4.56 (t, *J* = 6.4 Hz, 2H), 2.78 (t, *J* = 6.4 Hz, 2H).

**<sup>13</sup>C NMR** (100 MHz, CD<sub>3</sub>CN) δ 192.1, 163.7, 147.2, 145.3, 137.6, 129.6, 129.2, 126.5, 122.6, 120.3, 68.3, 64.6, 38.0.

**HRMS (ESI)** Calculated for C<sub>15</sub>H<sub>14</sub>NO<sub>2</sub><sup>+</sup> (M-ClO<sub>4</sub><sup>-</sup>): 240.1019, measured: 240.1021.

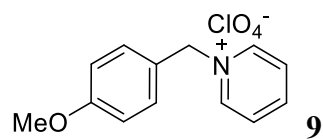

The reaction was conducted following the general procedure for benzyl pyridinium formation.

NMR yield: 86%

Spectra Available in the Literature: Yes<sup>11</sup>

The product decomposed during purification. Therefore, the crude NMR spectrum is provided in the collection of spectra below.

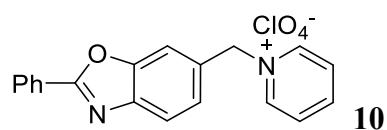

The reaction was conducted following the general procedure for benzyl pyridinium formation.

NMR yield: 56%

Spectra Available in the Literature: No

The product decomposed during purification. Therefore, the crude NMR spectrum is provided in the collection of spectra below.

**HRMS (ESI)** Calculated for C<sub>19</sub>H<sub>15</sub>N<sub>2</sub>O<sup>+</sup> (M-ClO<sub>4</sub><sup>-</sup>): 287.1179, measured: 287.1180.



## 8. Further Transformations of Benzyl Iodides

### 1) C-N bond formation

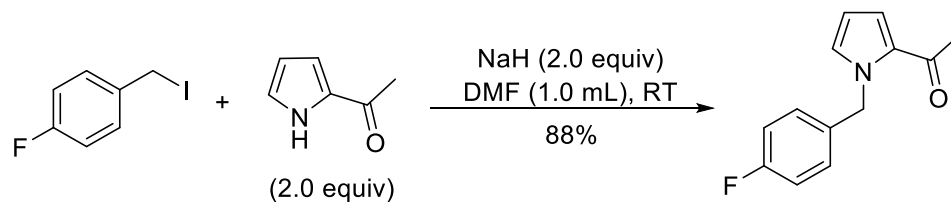

(2-Pyrrolyl)ethenone (0.24 mmol, 2.0 equiv.) and NaH (0.24 mmol, 2.0 equiv.) were added into DMF (0.5 mL), to which was added the solution of **2f** (0.12 mmol in 0.5 mL DMF) dropwise. The mixture was stirred at room temperature for 3 h, after that the reaction mixture was extracted with EtOAc and water. The organic layers were combined, dried over Na<sub>2</sub>SO<sub>4</sub> and concentrated, the residue was purified by column chromatography on silica gel with a gradient eluent of pentane and ethyl acetate to give **11** (23 mg, light yellow oil). The spectrum was consistent with the literature data.<sup>12</sup>

<sup>1</sup>H NMR (400 MHz, CDCl<sub>3</sub>) δ 7.14 – 7.06 (m, 2H), 7.01 (dd, *J* = 4.0, 1.6 Hz, 1H), 6.99 – 6.95 (m, 2H), 6.91 (dd, *J* = 2.4, 1.6 Hz, 1H), 6.20 (dd, *J* = 4.0, 2.4 Hz, 1H), 5.53 (s, 2H), 2.41 (s, 3H).

<sup>13</sup>C NMR (100 MHz, CDCl<sub>3</sub>) δ 188.4, 162.0 (d, *J* = 245.6 Hz), 134.0 (d, *J* = 3.2 Hz), 130.2, 130.1, 128.7 (d, *J* = 8.1 Hz), 120.5, 115.4 (d, *J* = 21.5 Hz), 108.6, 51.8, 27.2.

### 2) C-O bond formation

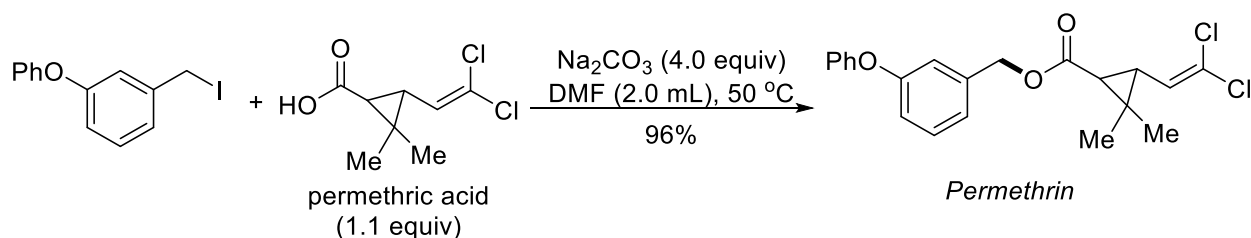

**2h** (0.2 mmol) and Permethric acid (0.22 mmol, 1.1 equiv.) were dissolved in DMF (2.0 mL), followed by addition of Na<sub>2</sub>CO<sub>3</sub> (4.0 equiv.). The mixture was stirred at 50 °C for 6 h, after that the reaction mixture was cooled to room temperature and extracted with EtOAc and water. The organic layers were combined, dried over Na<sub>2</sub>SO<sub>4</sub> and concentrated, the residue was purified by column chromatography on silica gel with a gradient eluent of pentane and ethyl acetate to give **12** (75 mg, viscous oil). The spectrum was consistent with the literature data.<sup>13</sup>

*cis*-permethrin:

<sup>1</sup>H NMR (400 MHz, CDCl<sub>3</sub>) δ 7.37 – 6.29 (m, 3H), 7.13 (t, *J* = 7.6 Hz, 1H), 7.09 (d, *J* = 7.6 Hz, 1H), 7.06 – 6.99 (m, 3H), 6.97 (dd, *J* = 8.0, 1.6 Hz, 1H), 6.27 (d, *J* = 9.2 Hz, 1H), 5.10 (d, *J* = 12.4 Hz, 1H), 5.06 (d, *J* = 12.4 Hz, 1H), 2.05 (t, *J* = 8.4 Hz, 1H), 1.90 (d, *J* = 8.4 Hz, 1H), 1.25 (s, 3H),

1.25 (s, 3H).

$^{13}\text{C}$  NMR (100 MHz,  $\text{CDCl}_3$ )  $\delta$  170.3, 157.5, 156.9, 137.9, 129.9, 129.8, 124.8, 123.5, 122.7, 120.7, 119.0, 118.4, 118.2, 65.7, 32.7, 31.8, 28.3, 27.7, 14.9.

*trans*-permethrin:

$^1\text{H}$  NMR (400 MHz,  $\text{CDCl}_3$ )  $\delta$  7.40 – 7.31 (m, 3H), 7.13 (t,  $J = 7.6$  Hz, 1H), 7.09 (d,  $J = 7.6$  Hz, 1H), 7.05 – 6.99 (m, 3H), 6.96 (dd,  $J = 8.4, 1.6$  Hz, 1H), 5.61 (d,  $J = 8.4$  Hz, 1H), 5.12 (d,  $J = 13.2$  Hz, 1H), 5.09 (d,  $J = 13.2$  Hz, 2H), 2.26 (dd,  $J = 8.4, 5.2$  Hz, 1H), 1.66 (d,  $J = 5.2$  Hz, 1H), 1.28 (s, 3H), 1.19 (s, 3H).

$^{13}\text{C}$  NMR (100 MHz,  $\text{CDCl}_3$ )  $\delta$  170.9, 157.5, 156.9, 137.9, 129.9, 129.8, 126.9, 123.5, 122.7, 122.1, 119.0, 118.4, 118.2, 66.0, 34.6, 33.0, 29.1, 22.6, 20.0.

### 3) C-C bond formation

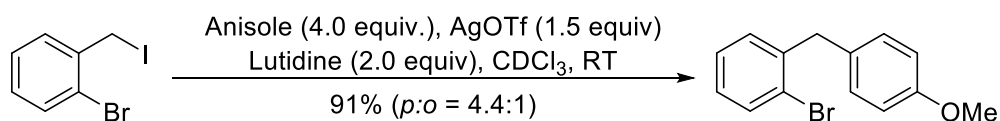

Anisole (0.4 mmol, 4.0 equiv.), Lutidine (0.2 mmol, 2.0 equiv.) and AgOTf (0.15 mmol, 1.5 equiv.) were added into  $\text{CDCl}_3$  (0.5 mL). To this suspension was added dropwise the solution of **2g** in  $\text{CDCl}_3$  (0.5 mL, 0.2 M) at room temperature, during which yellow solid was generated. The mixture was stirred for 1hr, then filtered through a short pad of celite and washed with ethyl acetate (10 mL). After evaporation, the residue was purified by column chromatography on silica gel with a gradient eluent of pentane and ethyl acetate to give **13** (25 mg, *p:o* = 4.4:1, colorless oil). The spectrum was consistent with the literature data.<sup>14</sup>

$^1\text{H}$  NMR (400 MHz,  $\text{CDCl}_3$ )  $\delta$  7.56 (dd,  $J = 8.0, 1.2$  Hz, 1H), 7.22 (td,  $J = 7.6, 1.2$  Hz, 1H), 7.14 – 7.04 (m, 4H), 6.84 (d,  $J = 8.4$  Hz, 2H), 4.05 (s, 2H), 3.79 (s, 3H).

$^{13}\text{C}$  NMR (100 MHz,  $\text{CDCl}_3$ )  $\delta$  158.0, 140.8, 132.8, 131.5, 130.9, 130.0, 127.8, 127.4, 124.8, 113.9, 55.2, 40.9.

## 9. NMR Spectra of Compounds.

D1704271232-MR-3-115-2-2-P-H

Group Stahl

H1\_standard.UW CDCl3 /home/fwang235/av400 fwang235 23

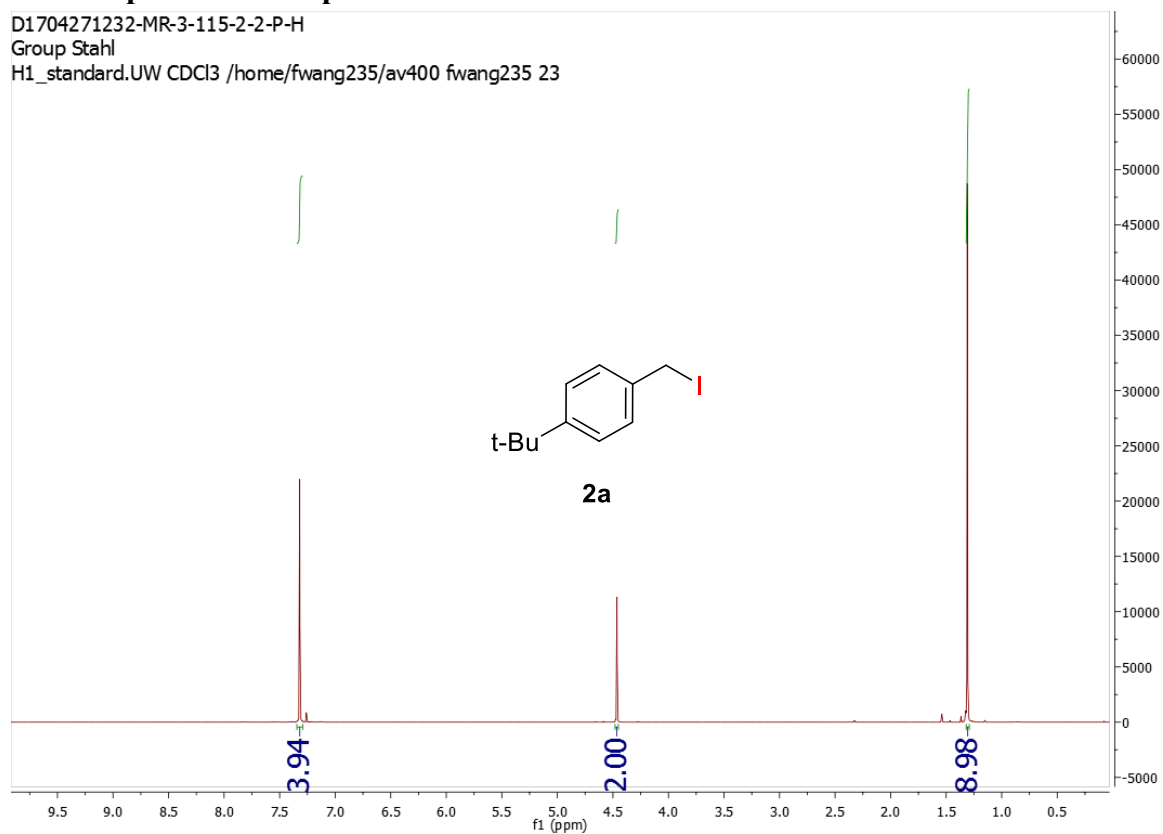

D1704271232-MR-3-115-2-2-P-C

Group Stahl

C13\_H1dec.UW CDCl3 /home/fwang235/av400 fwang235 23

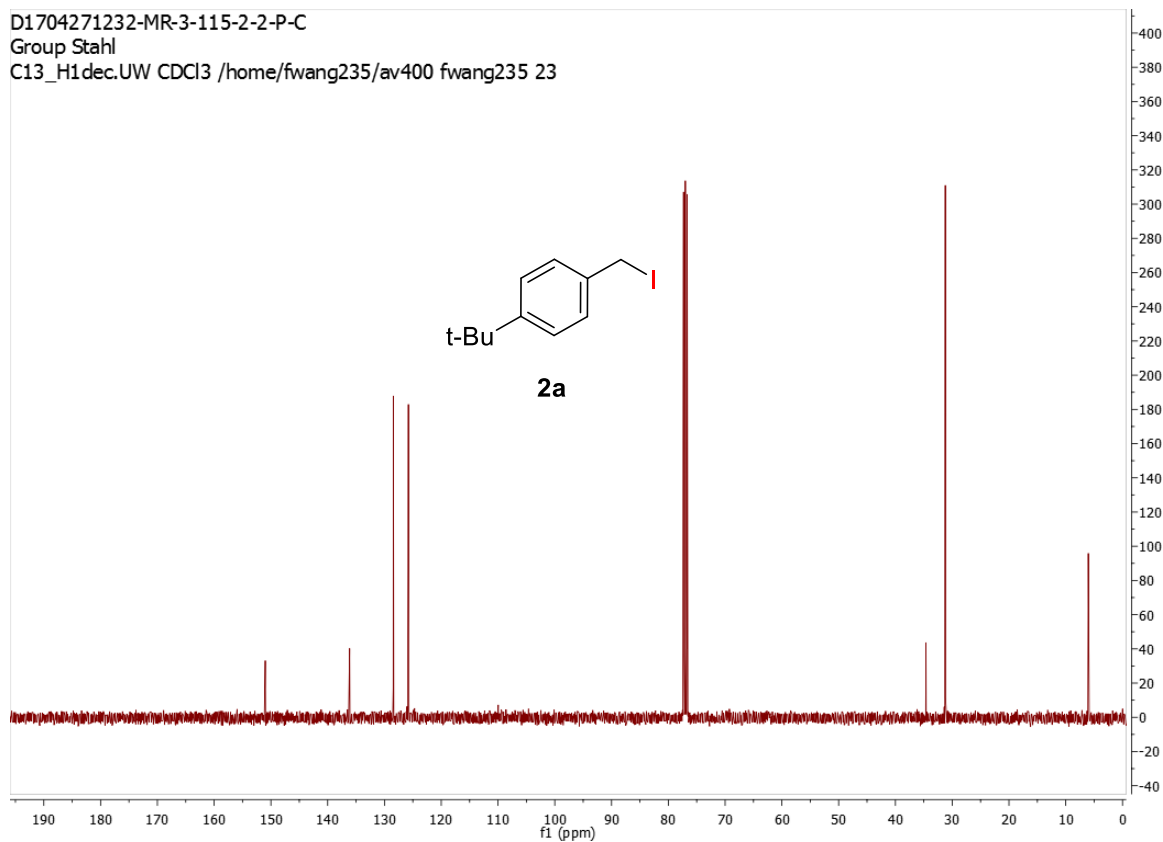

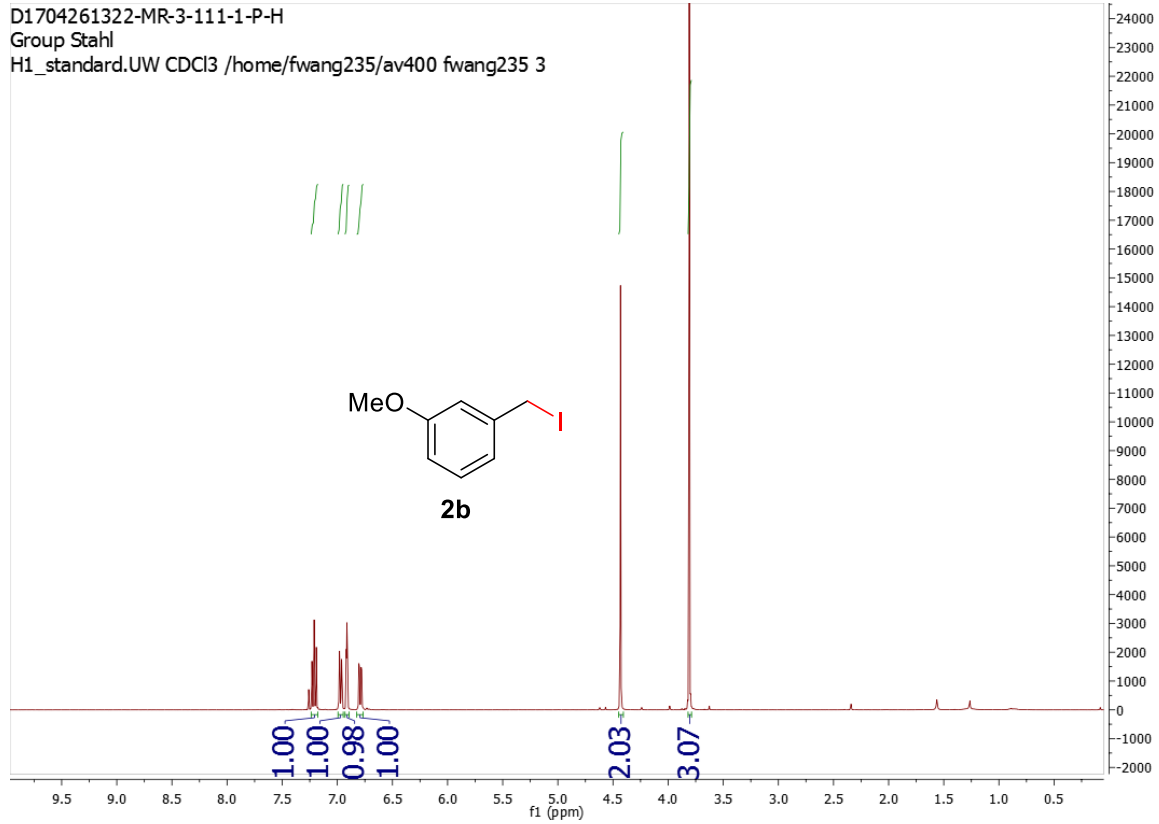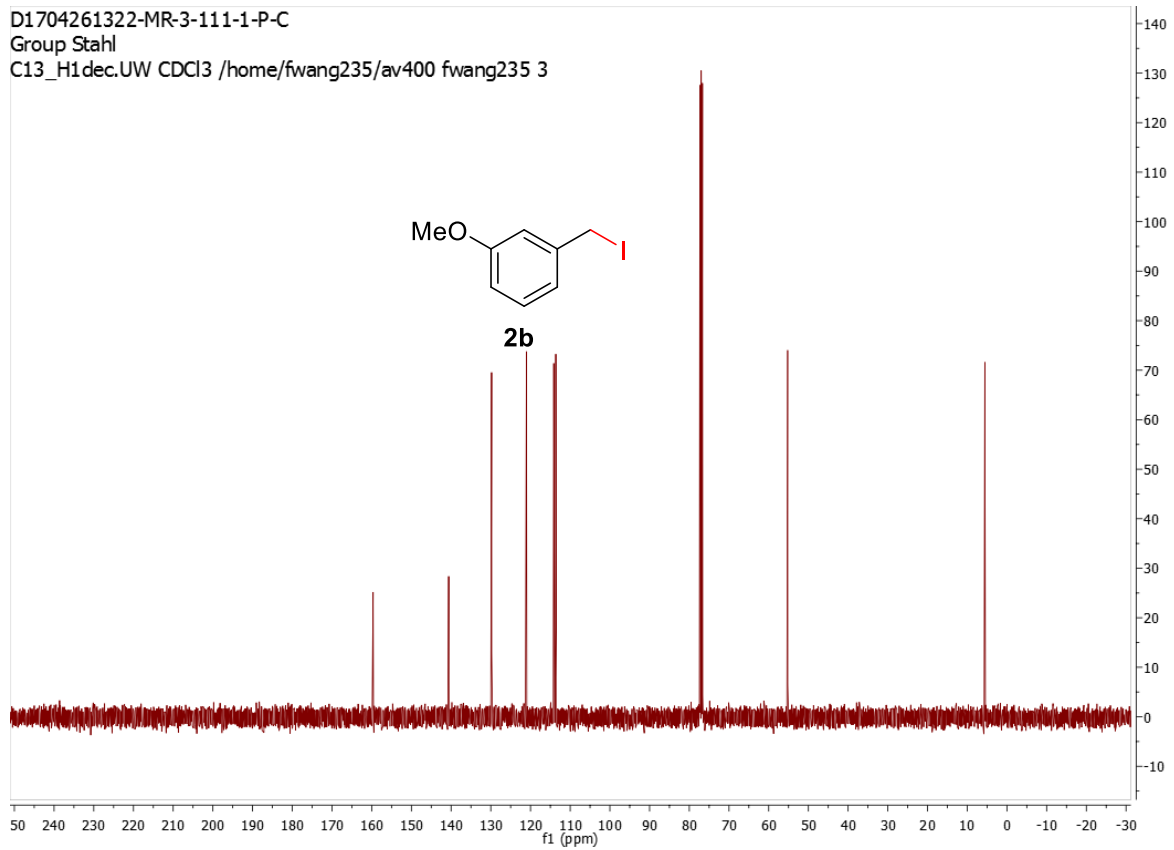

D1704241622-MR-3-111-2-P-H  
Group Stahl  
H1\_standard.UW CDCl3 /home/fwang235/av400 fwang235 27

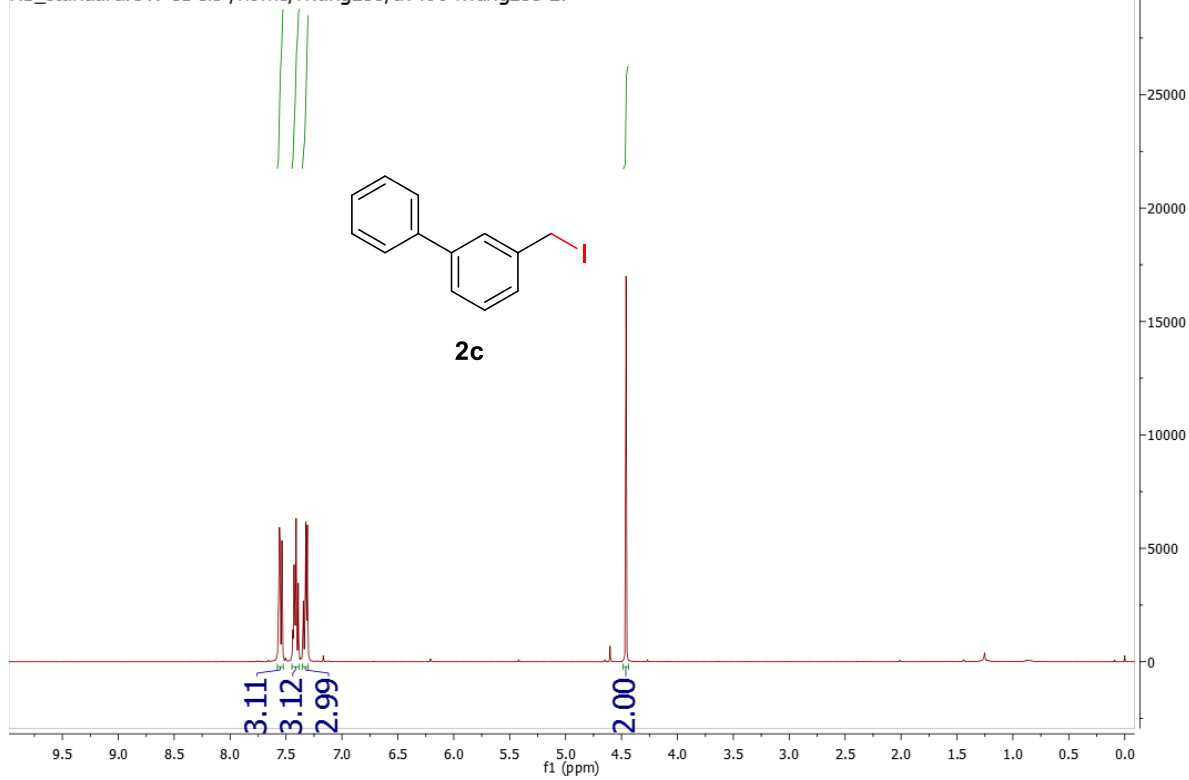

D1704251126-MR-3-111-2-C  
Group Stahl  
C13\_H1dec.UW CDCl3 /home/fwang235/av400 fwang235 2

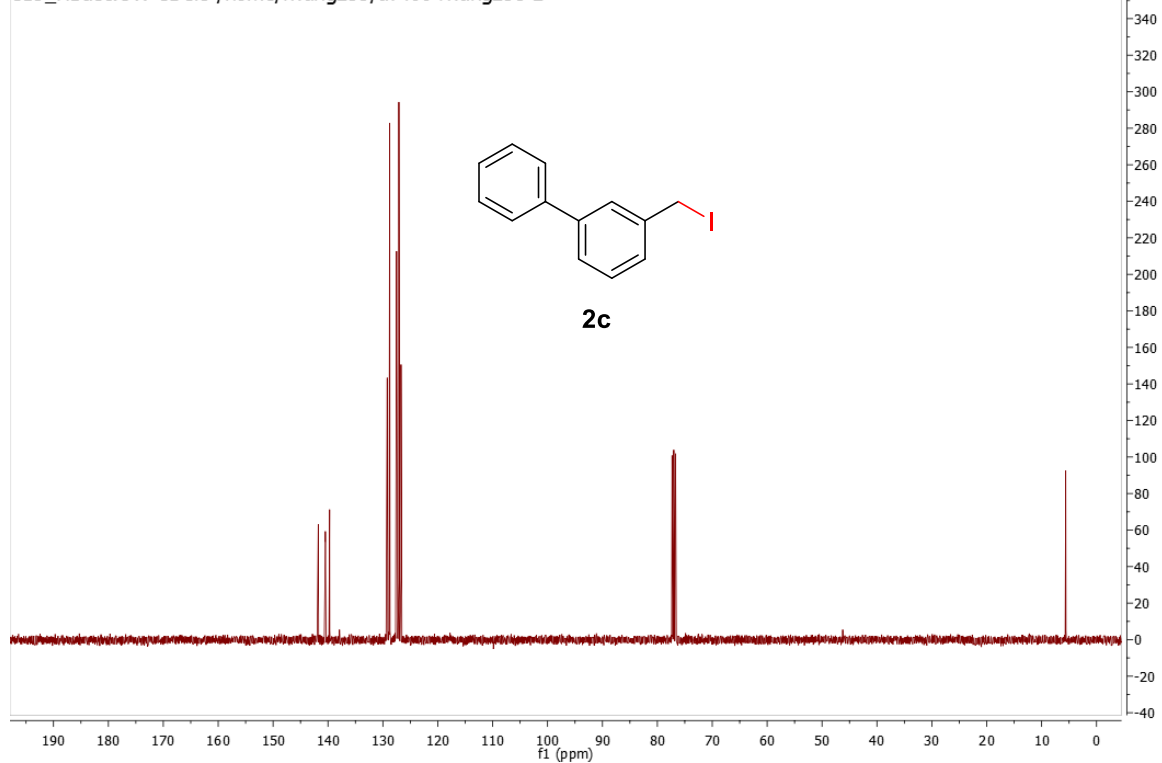

D1705050919-mr-3-117-6-p-h  
Group Stahl  
H1\_standard.UW CDCl3 /home/fwang235/av400 fwang235 58

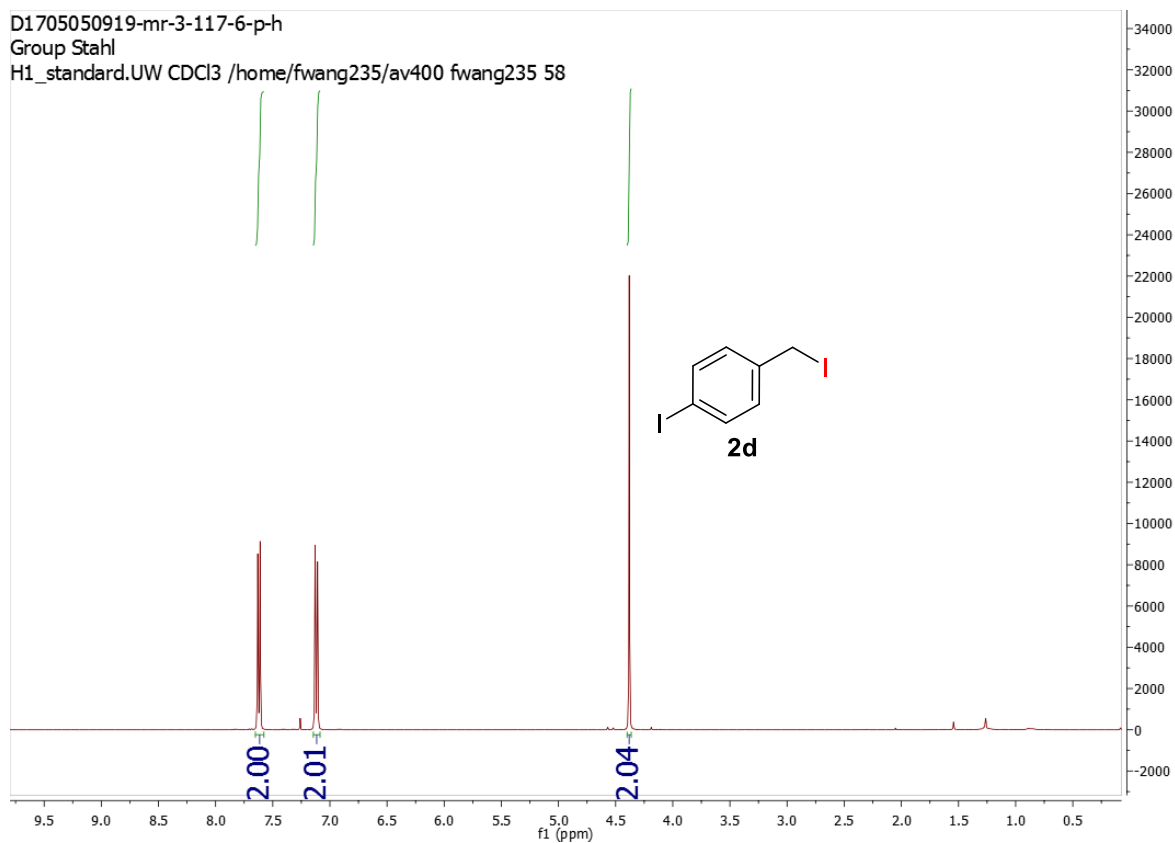

D1705050919-mr-3-117-6-p-c  
Group Stahl  
C13\_H1dec.UW CDCl3 /home/fwang235/av400 fwang235 58

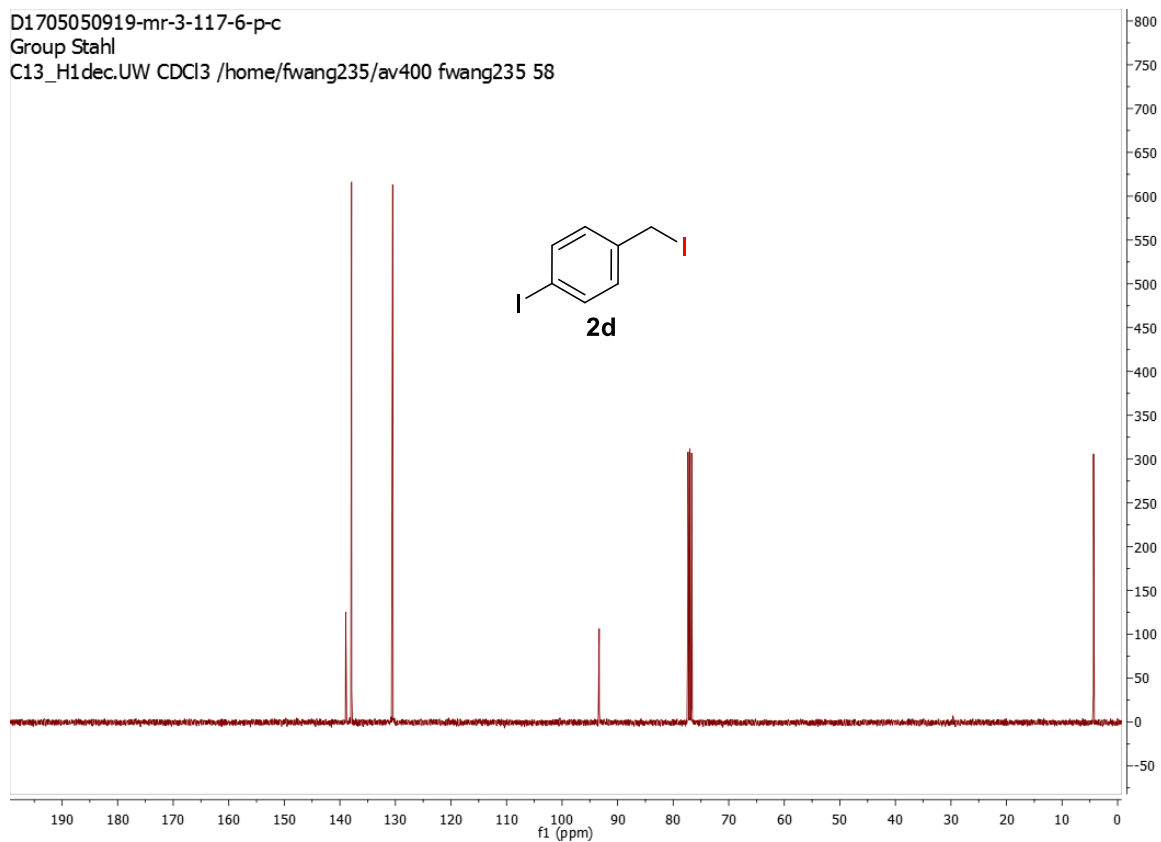

D1704241623-MR-3-111-4-P-H  
Group Stahl  
H1\_standard.UW CDCl3 /home/fwang235/av400 fwang235 29

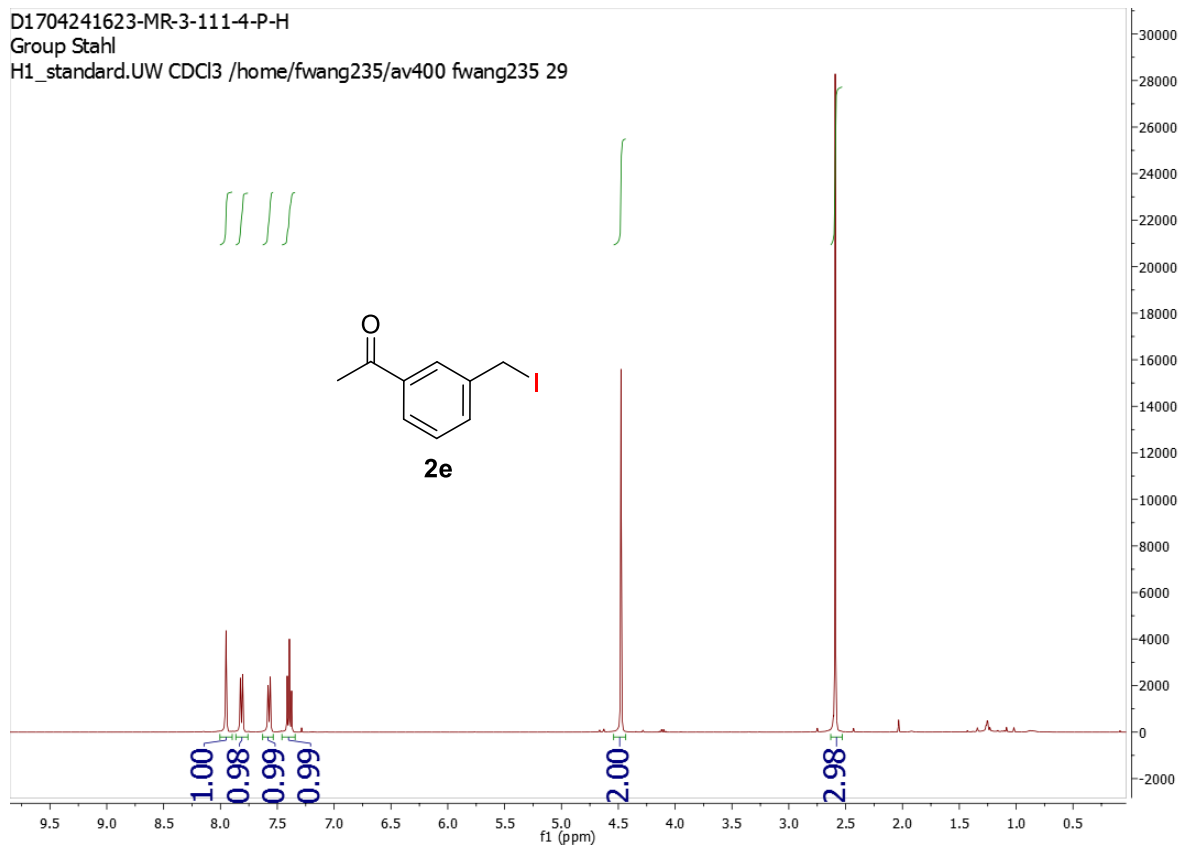

D1704251127-MR-3-111-4-C  
Group Stahl  
C13\_H1dec.UW CDCl3 /home/fwang235/av400 fwang235 4

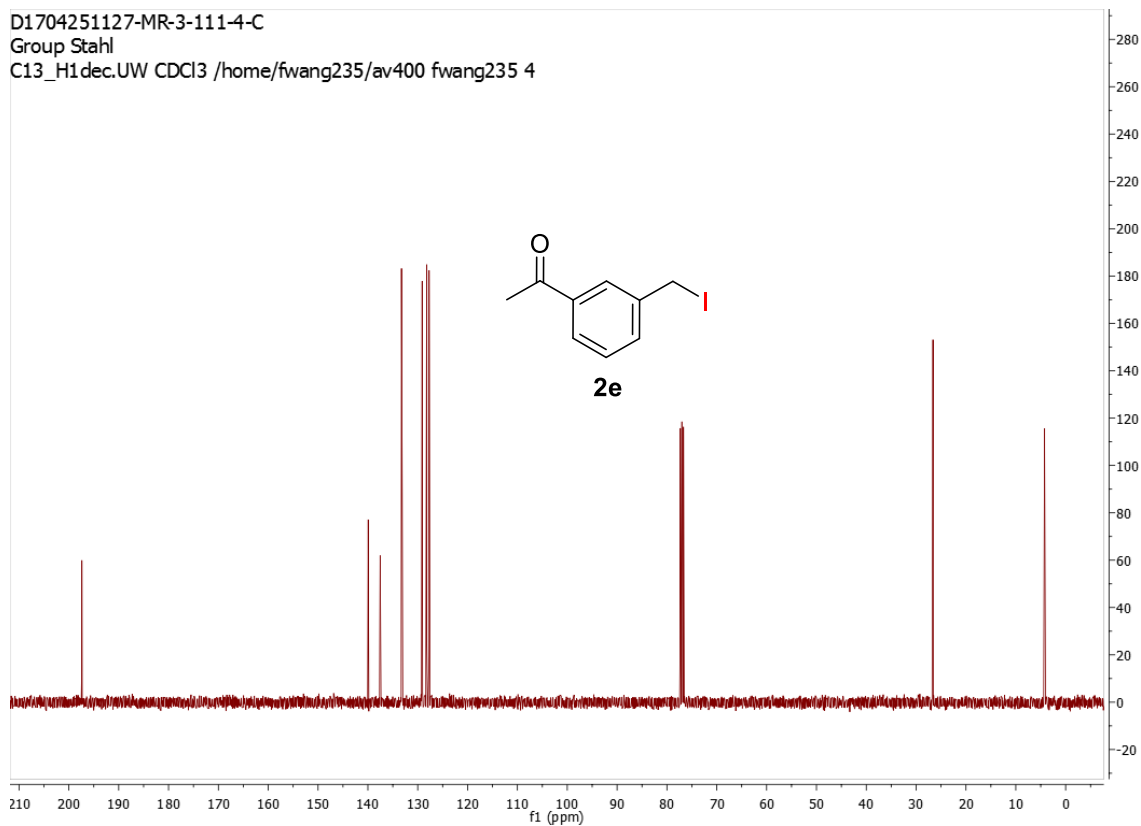

D1704171403-MR-3-1 Pure Product  
Group Stahl  
H1\_standard.UW CDCl3 /home/mrafee/av400 mrafee 36

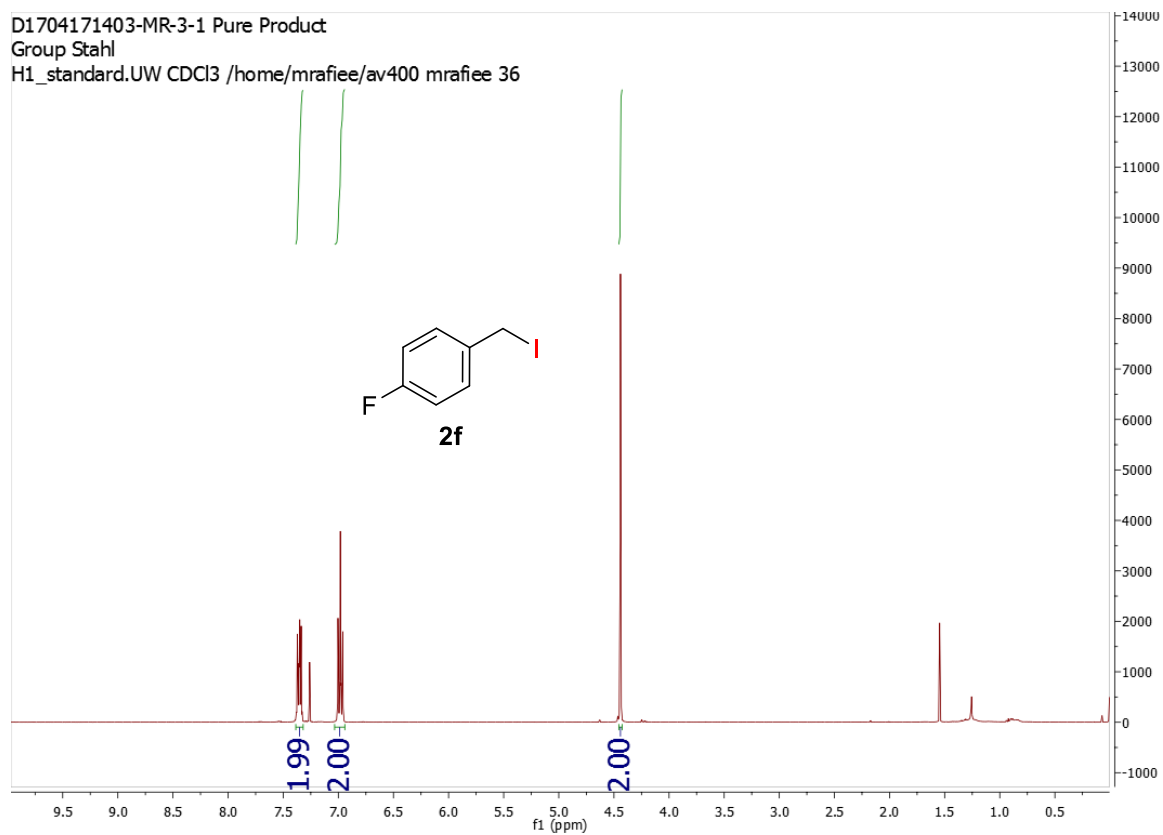

D1704181248-MR-3-Pure p-Fluoro  
Group Stahl  
C13\_H1dec.UW CDCl3 /home/mrafee/av400 mrafee 18

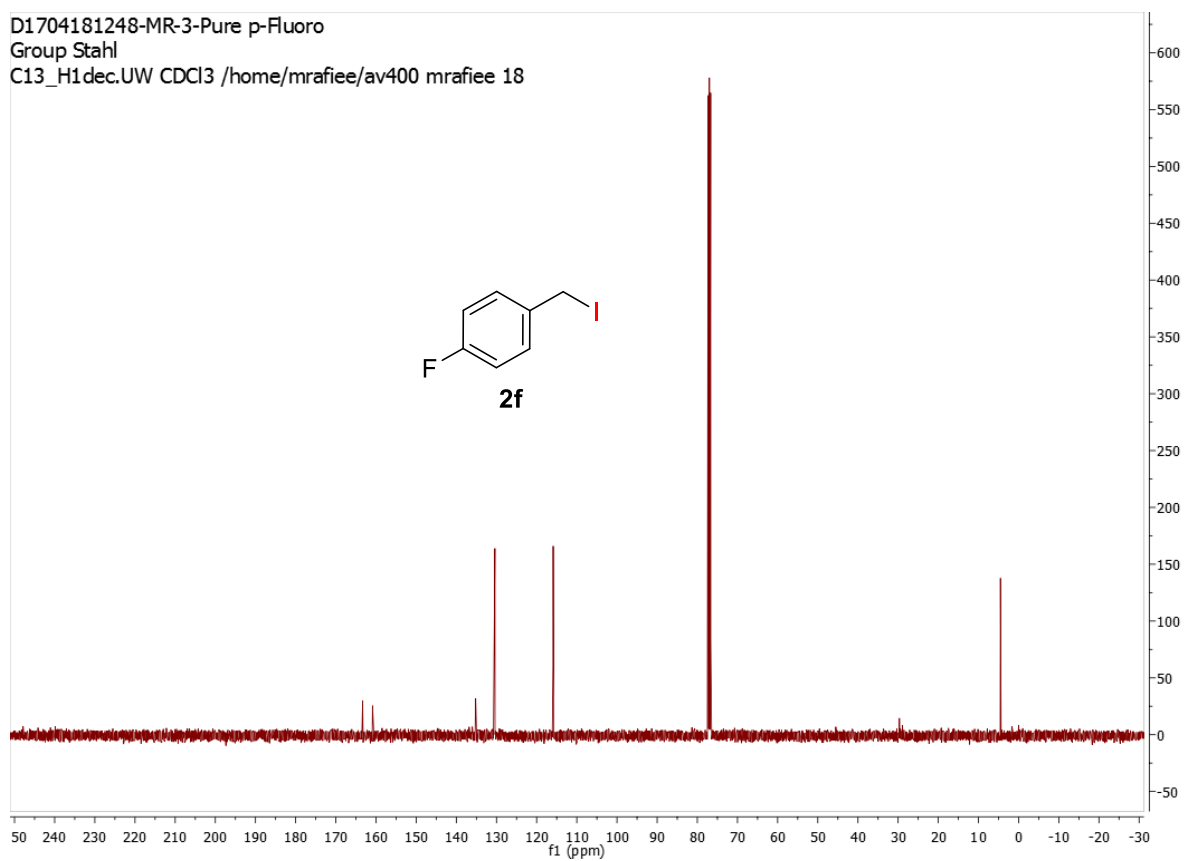



D1704171403-MR-3-2-Bromo Pure Product  
Group Stahl  
H1\_standard.UW CDCl3 /home/mrafee/av400 mrafee 40

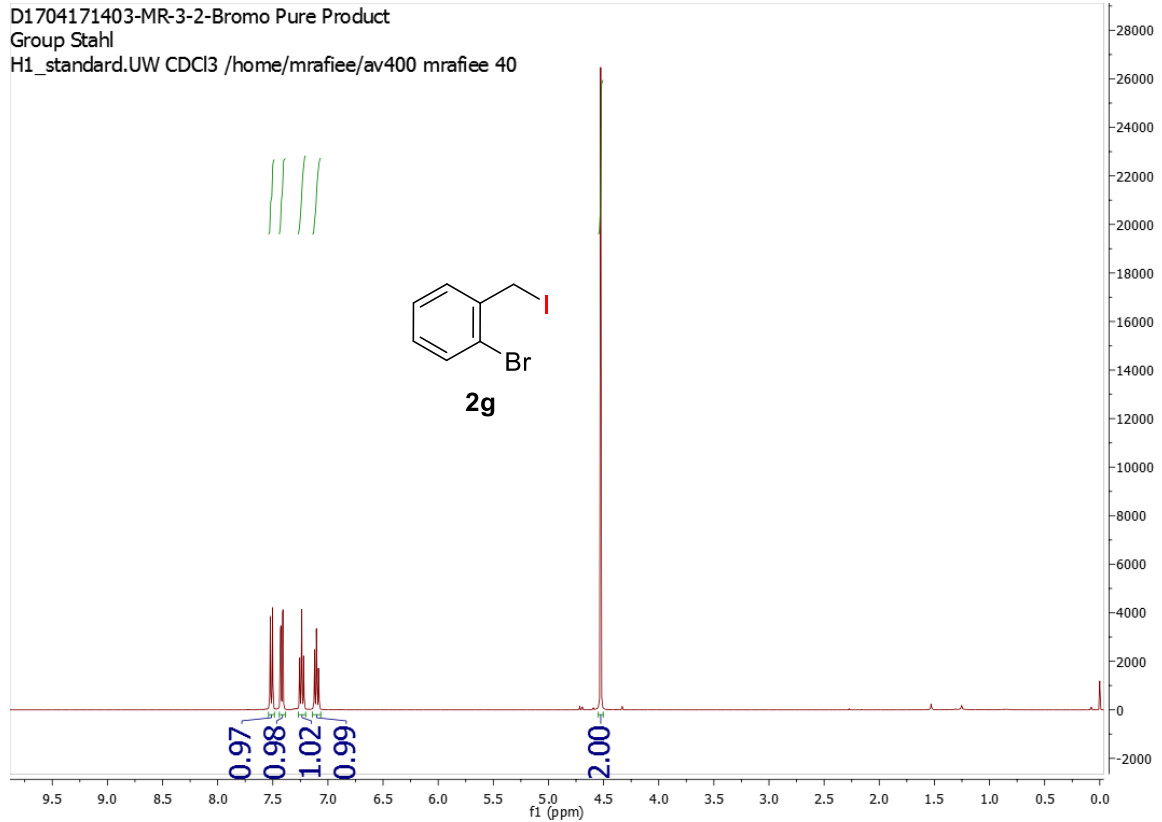

D1704171403-MR-3-2-Bromo Pure Product  
Group Stahl  
C13\_H1dec.UW CDCl3 /home/mrafee/av400 mrafee 40

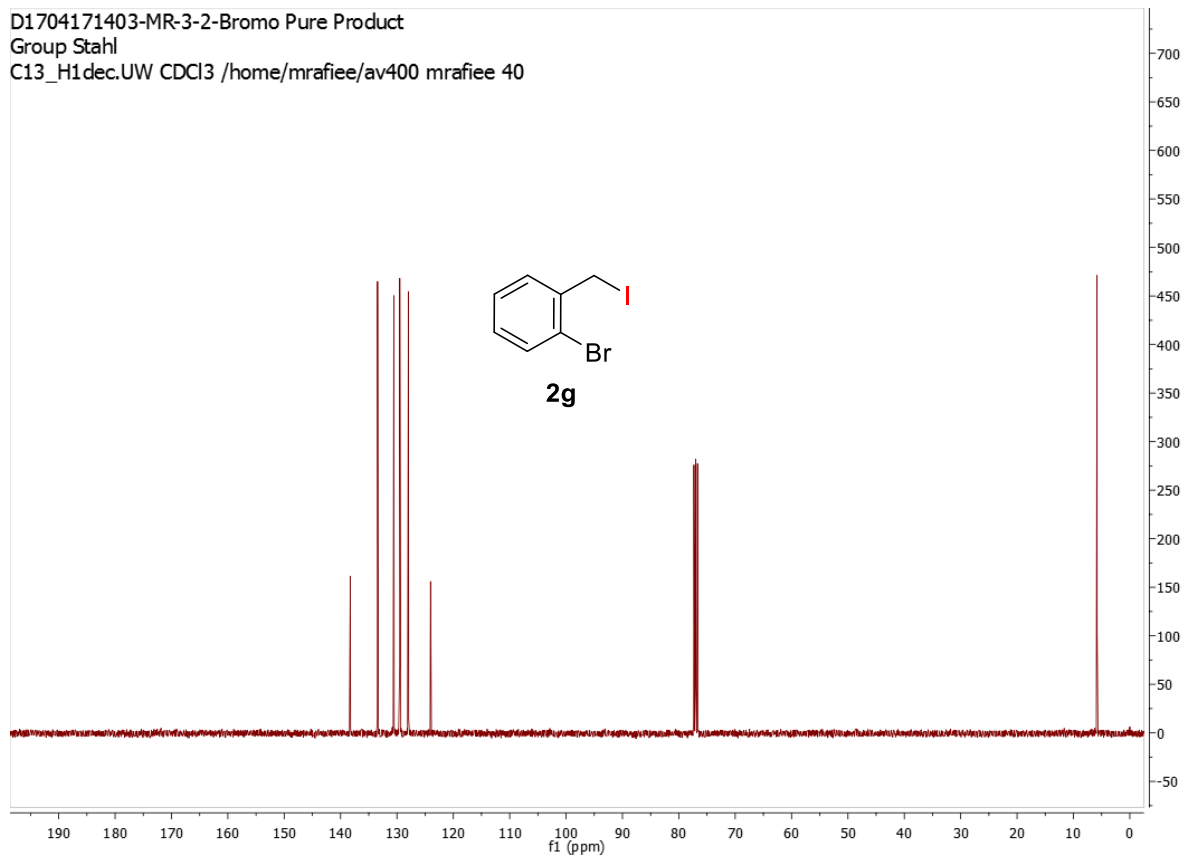

D1704171403-MR-3-3-Phenoxy Pure Product  
Group Stahl  
H1\_standard.UW CDCl3 /home/mrafee/av400 mrafee 39

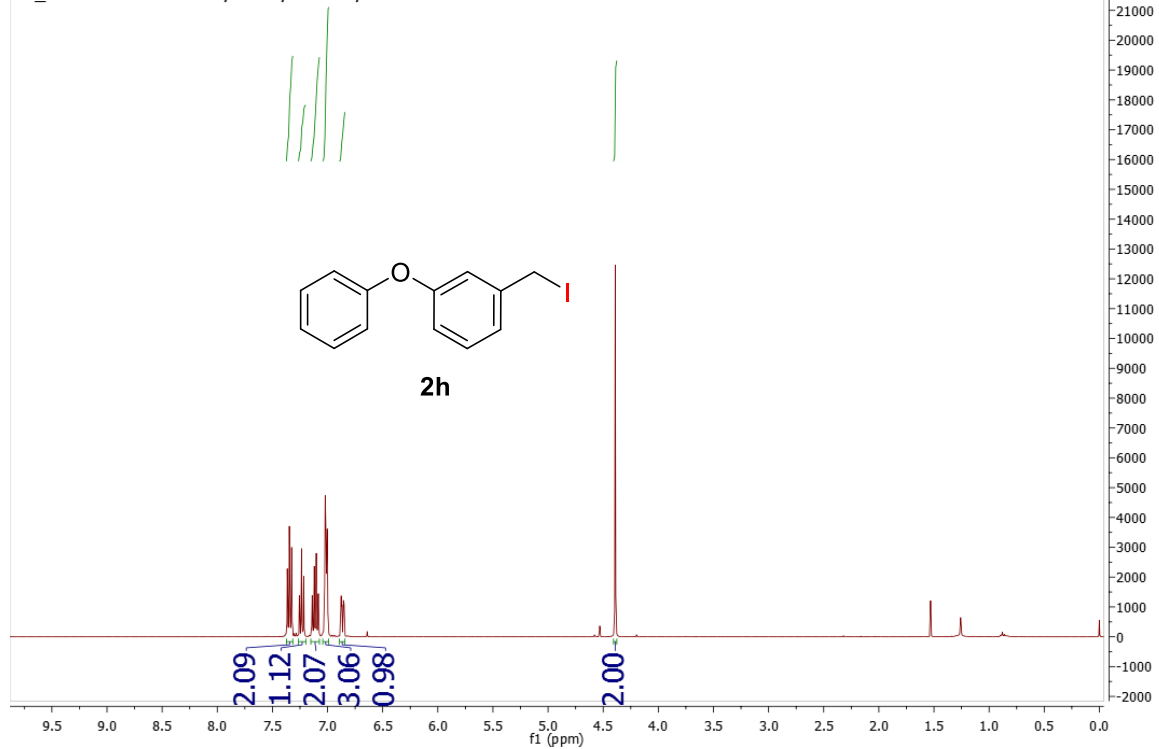

D1704171403-MR-3-3-Phenoxy Pure Product  
Group Stahl  
C13\_H1dec.UW CDCl3 /home/mrafee/av400 mrafee 39

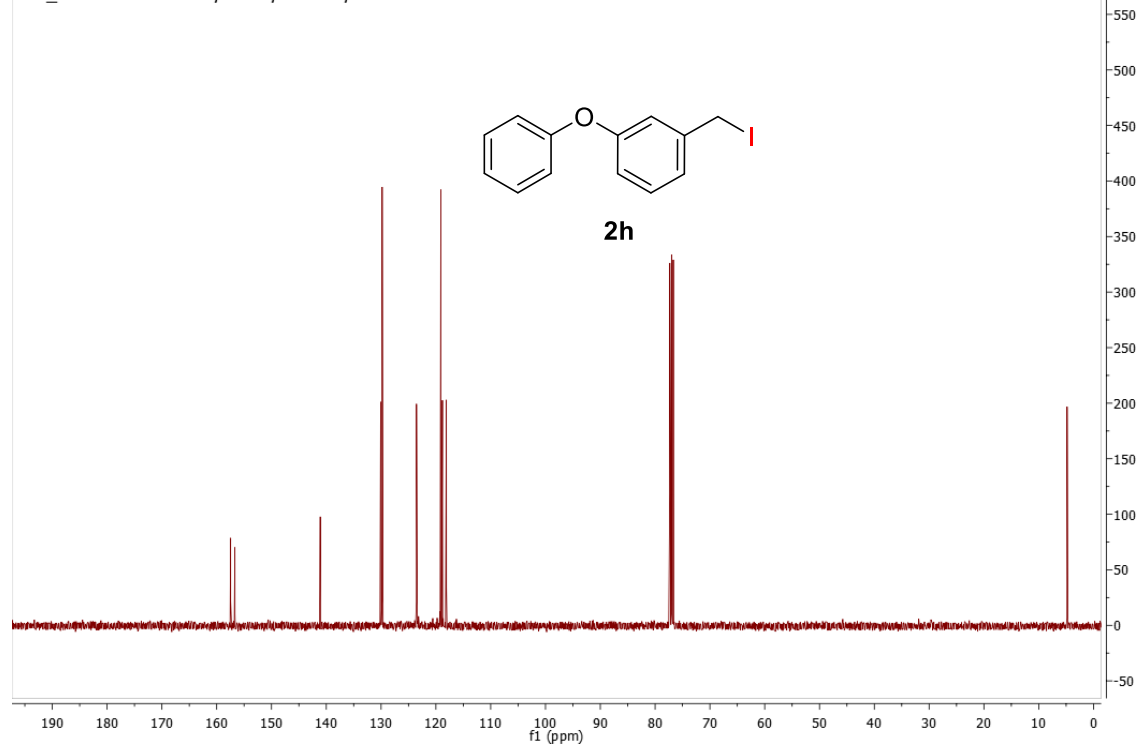

C1707291626-wf-MR-2-122-OAc-p-h  
Group Stahl  
H1\_standard.UW CDCl3 /home/fwang235/callisto fwang235 47

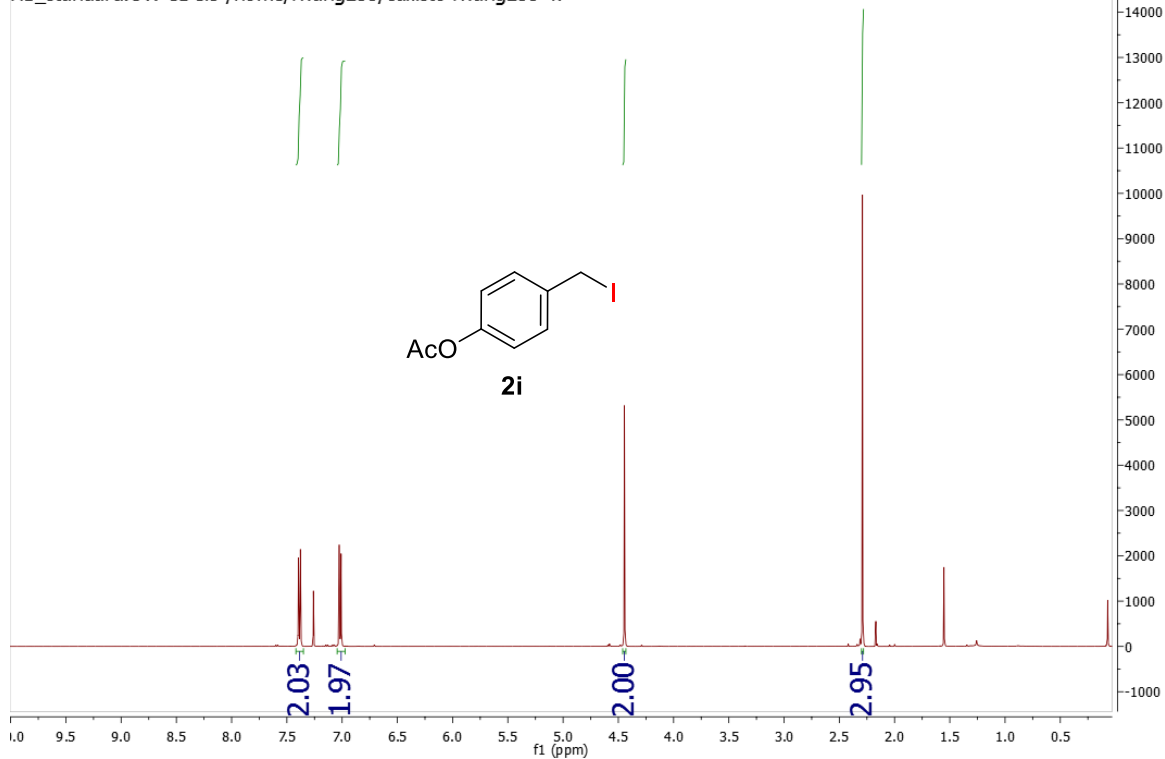

C1707291626-wf-MR-2-122-OAc-p-c  
Group Stahl  
C13\_H1dec.UW CDCl3 /home/fwang235/callisto fwang235 47

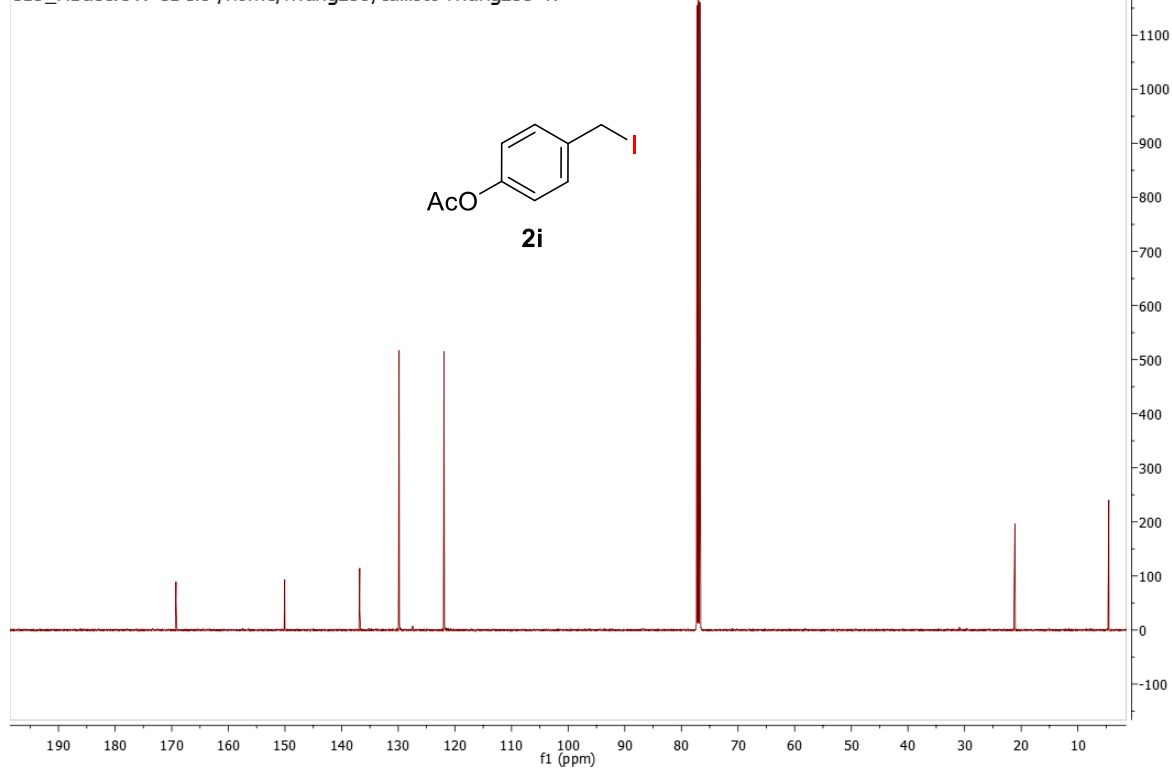

D1704241623MR-3-111-3-P-H  
Group Stahl  
H1\_standard.UW CDCl3 /home/fwang235/av400 fwang235 28

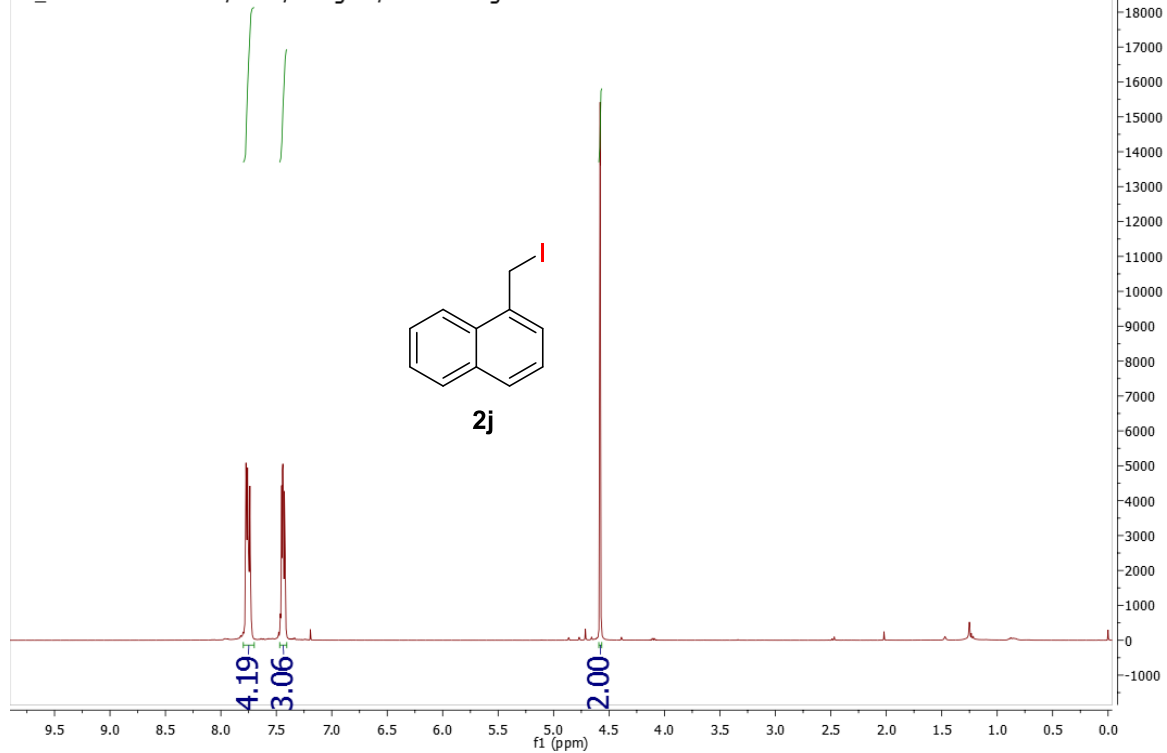

D1704251127-MR-3-111-3-C  
Group Stahl  
C13\_H1dec.UW CDCl3 /home/fwang235/av400 fwang235 3

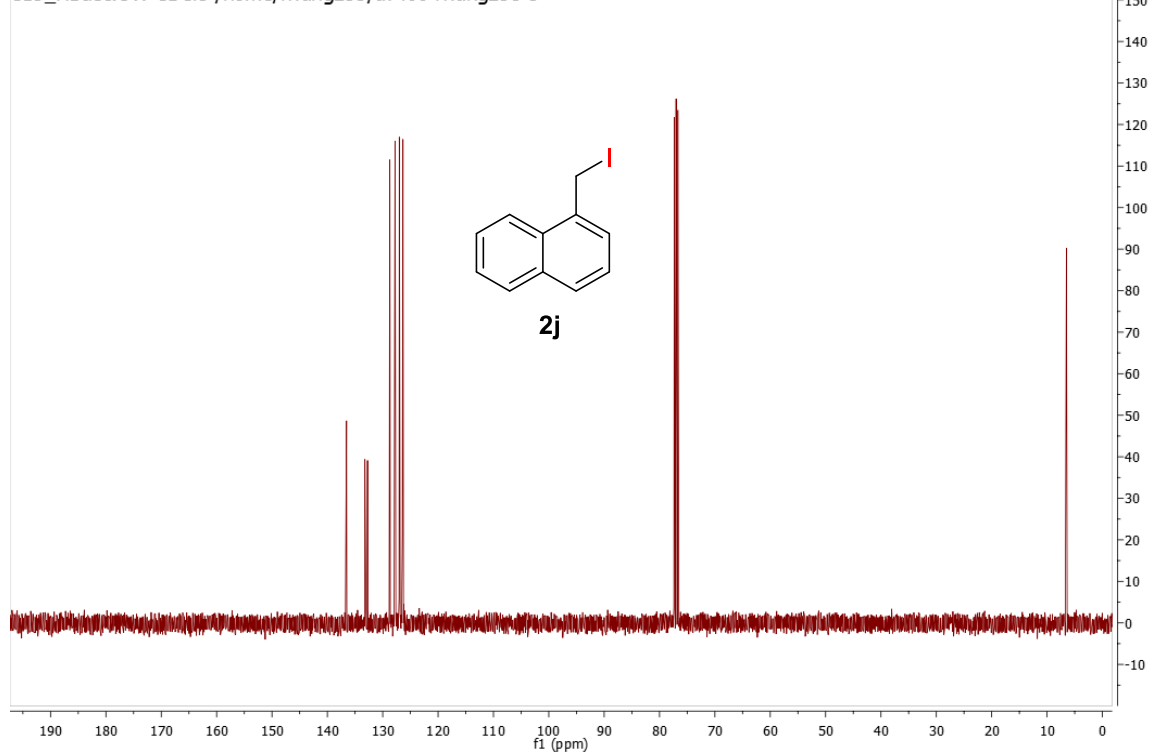

D1705050921-mr-3-117-8-p-h  
Group Stahl  
H1\_standard.UW CDCl3 /home/fwang235/av400 fwang235 59

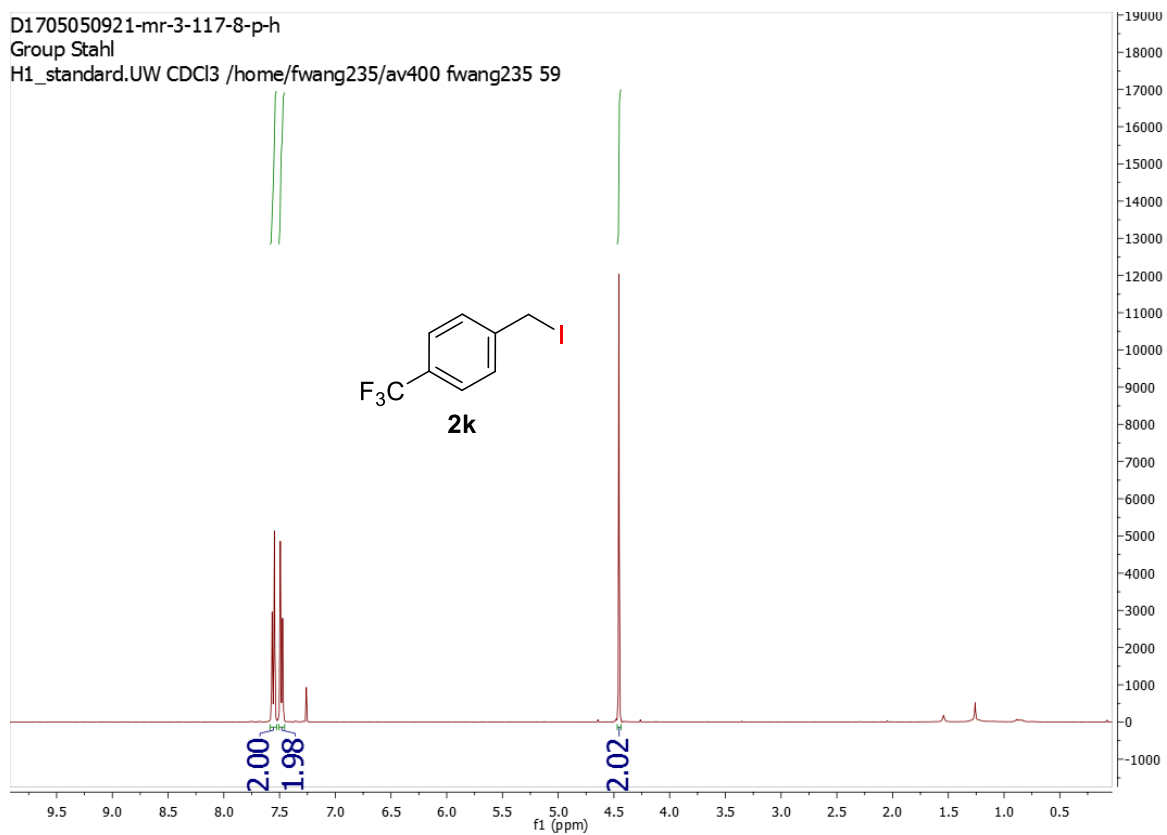

D1705051829-MR-3-117-8-P-C  
Group Stahl  
C13\_H1dec.UW CDCl3 /home/fwang235/av400 fwang235 59

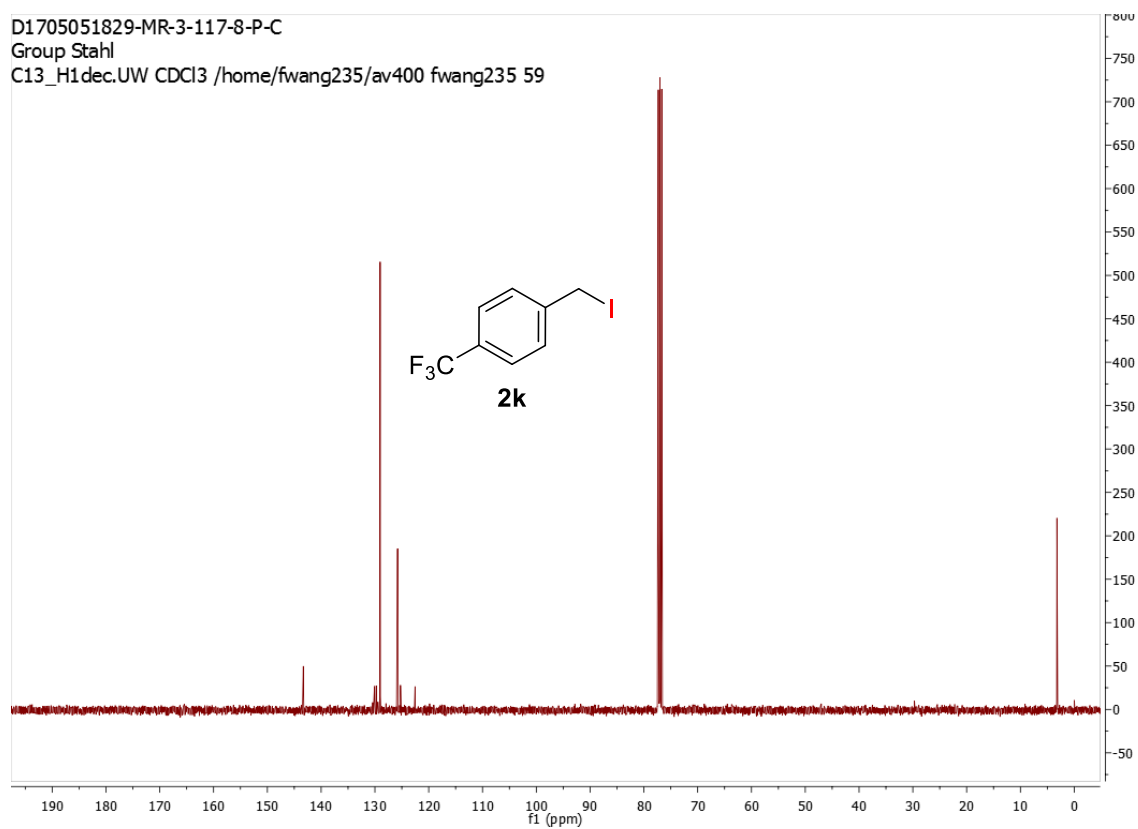

D1705051829-MR-3-117-8-P-F  
Group Stahl  
F19\_H1decoupled.UW CDCl3 /home/fwang235/av400 fwang235 59

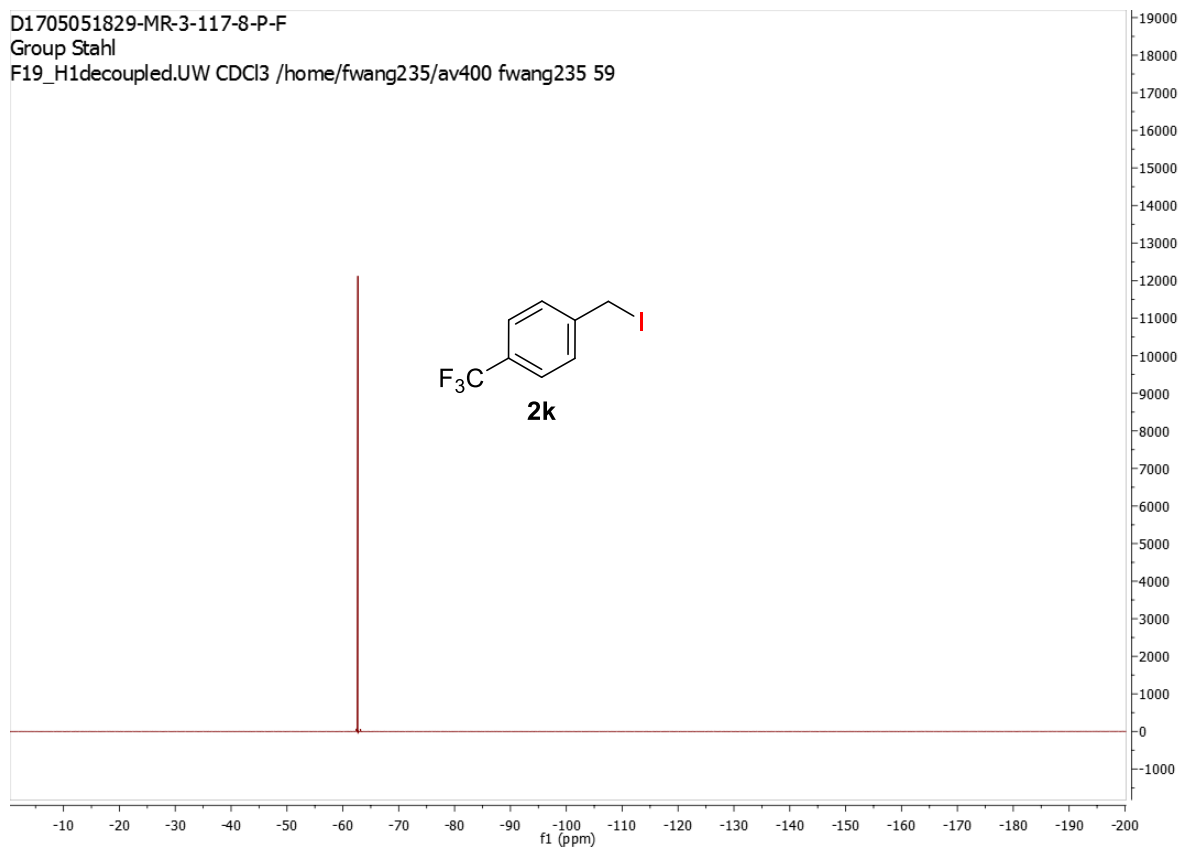

D1704171403-MR-3-2 Pure Product  
Group Stahl  
H1\_standard.UW CDCl3 /home/mrafee/av400 mrafee 37

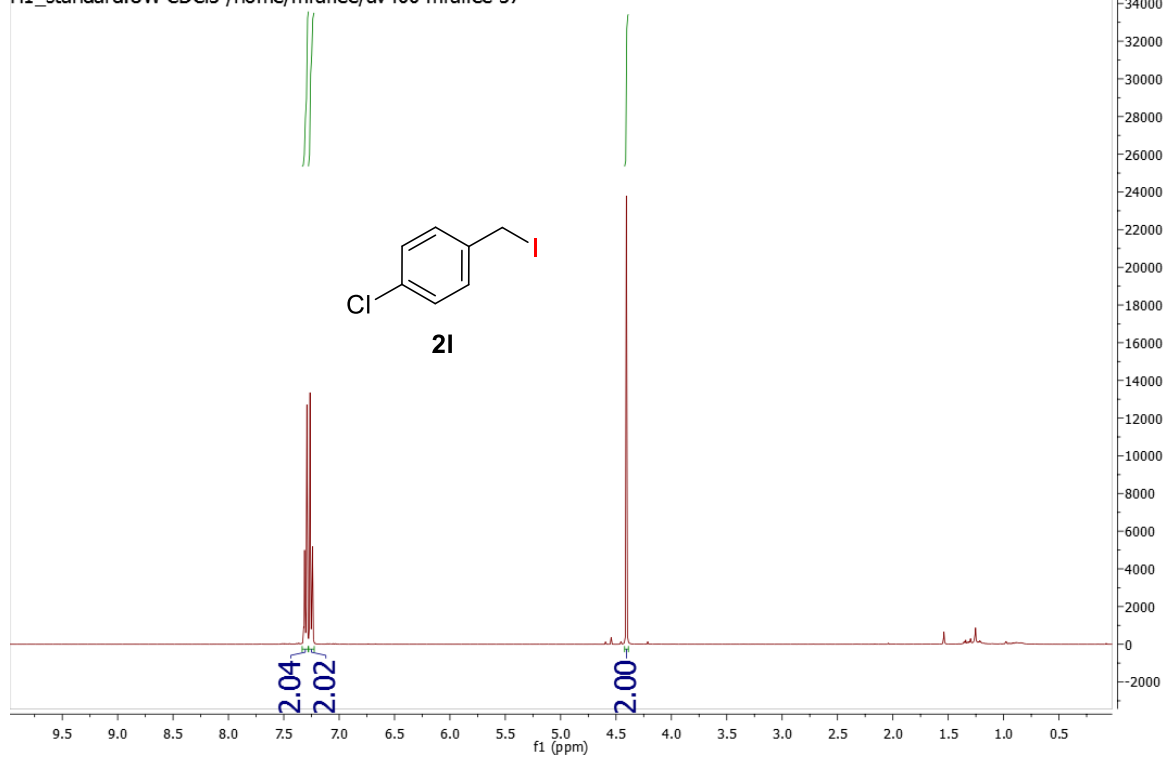

D1704171403-MR-3-2 Pure Product  
Group Stahl  
C13\_H1dec.UW CDCl3 /home/mrafee/av400 mrafee 37

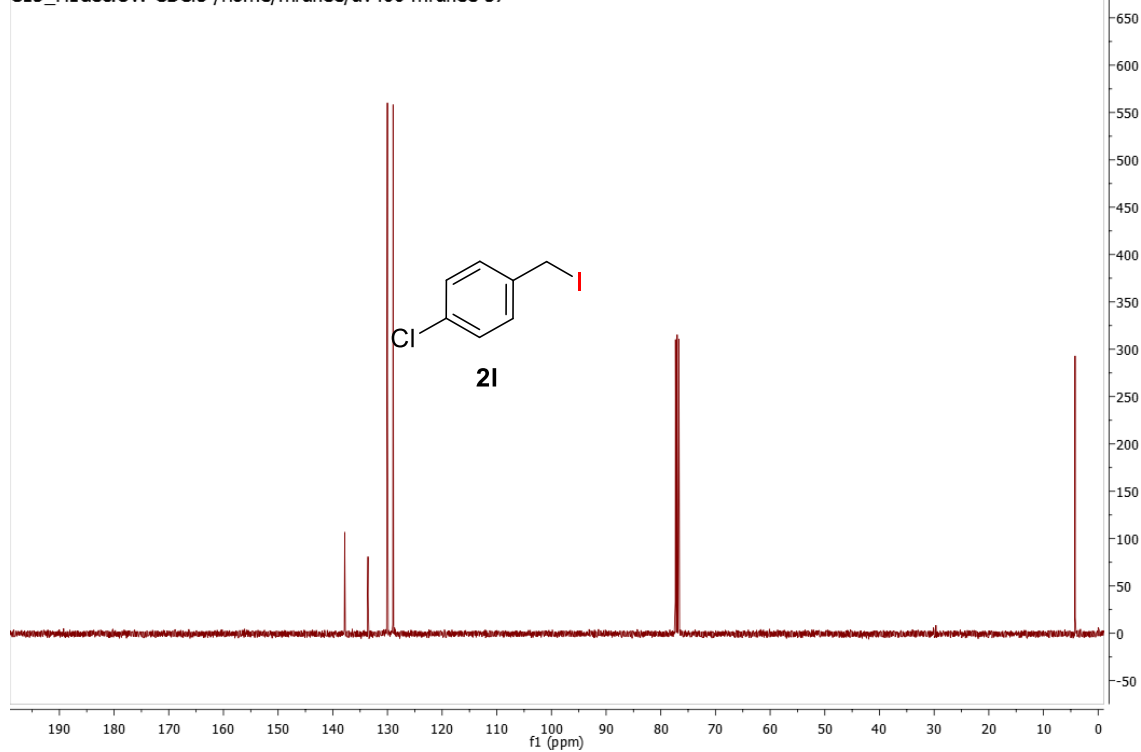

D1705170956-MR-3-100-2

Group Stahl

H1\_standard.UW CD3CN /home/mrafee/av400 mrafee 35

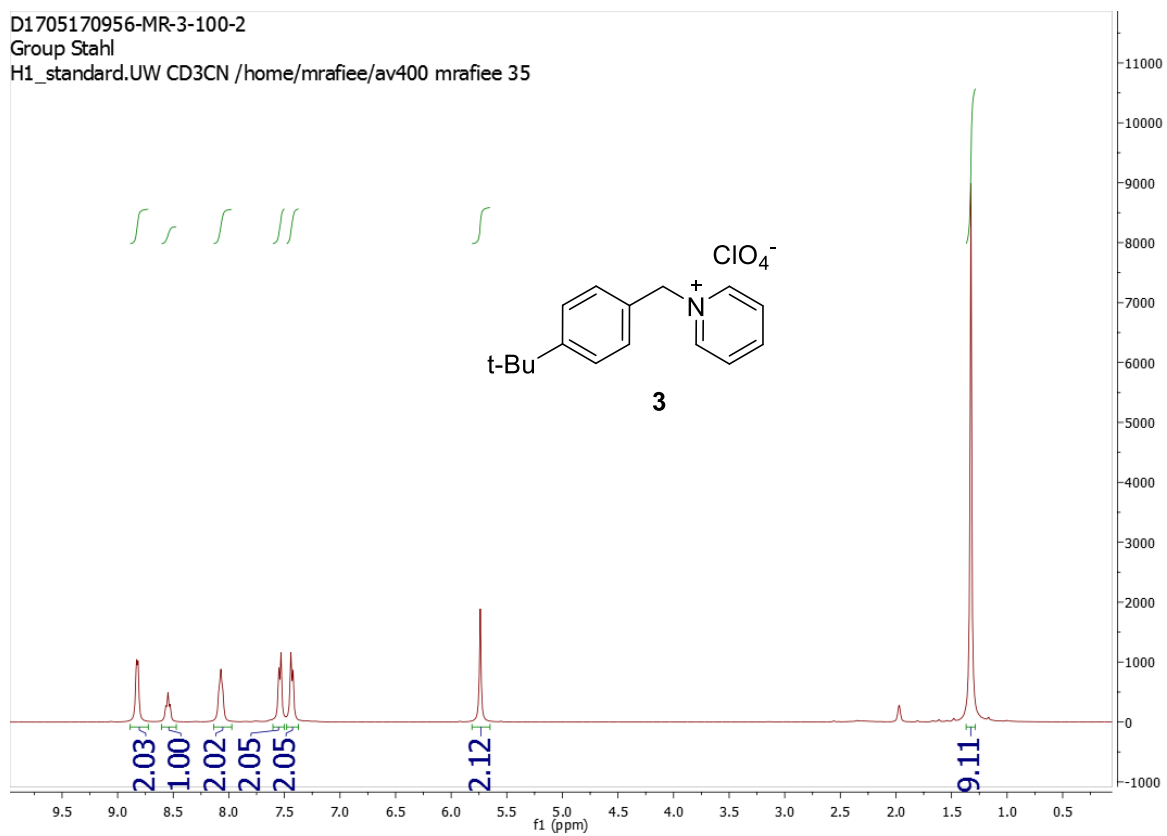

D1705170956-MR-3-100-2

Group Stahl

C13\_H1dec.UW CD3CN /home/mrafee/av400 mrafee 35

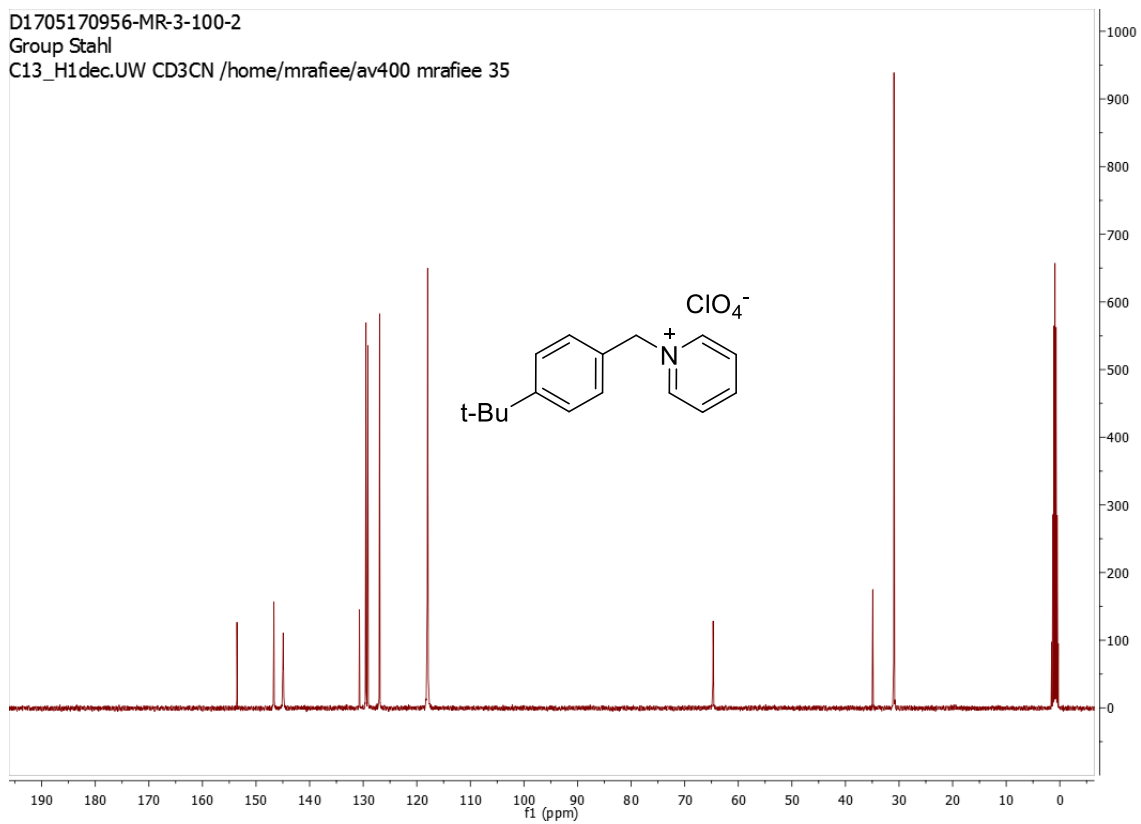



D1704181501-MR-3-72-C

Group Stahl

H1\_standard.UW CD3CN /home/mrafiee/av400 mrafiee 24

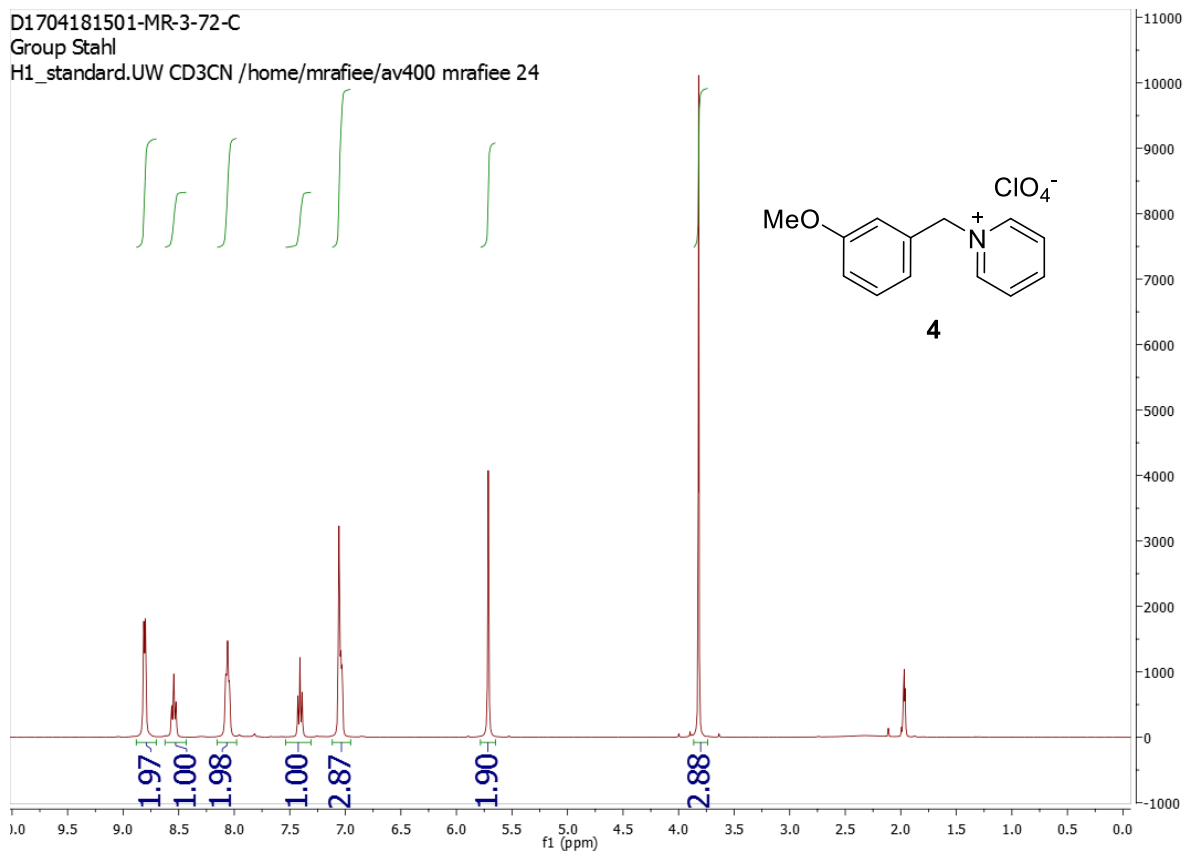

D1704181501-MR-3-72-C

Group Stahl

C13\_H1dec.UW CD3CN /home/mrafiee/av400 mrafiee 24

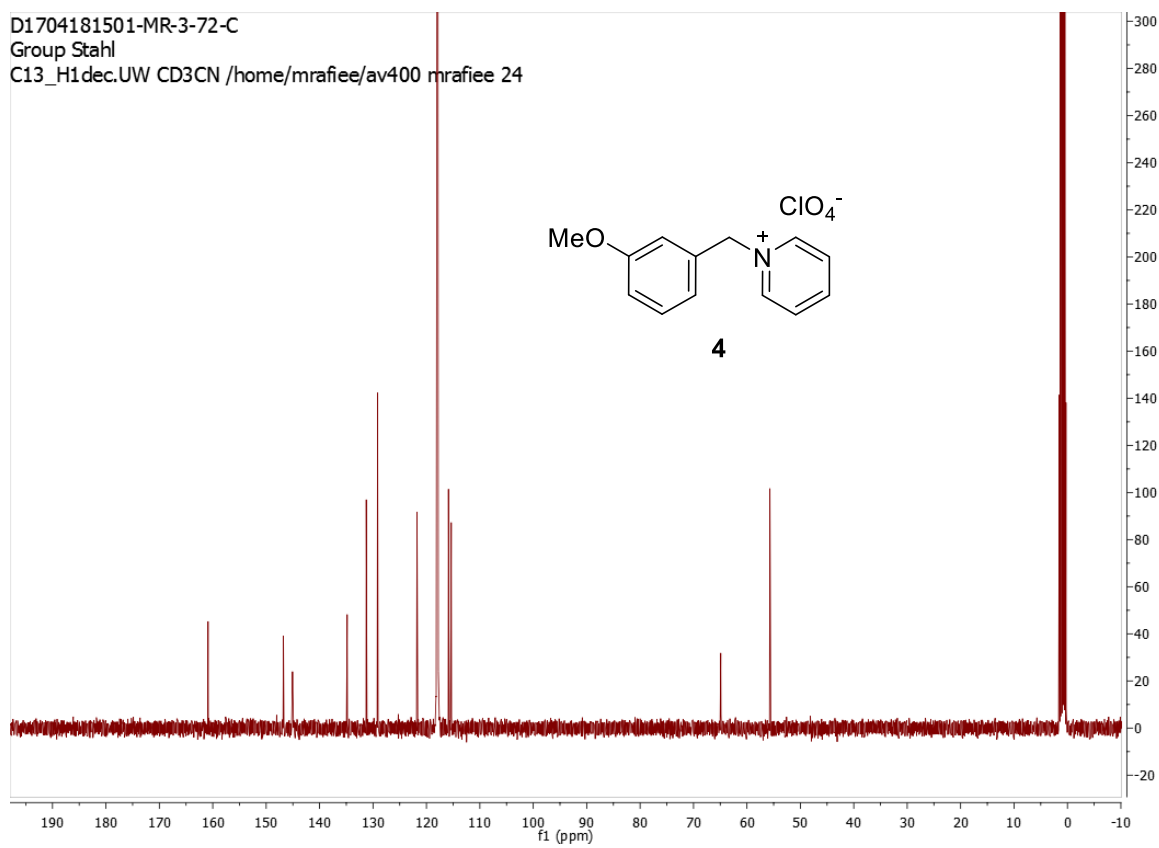

D1708141016-MR-3-124-2

Group Stahl

H1\_standard.UW CD3CN /home/mrafee/av400 mrafee 52

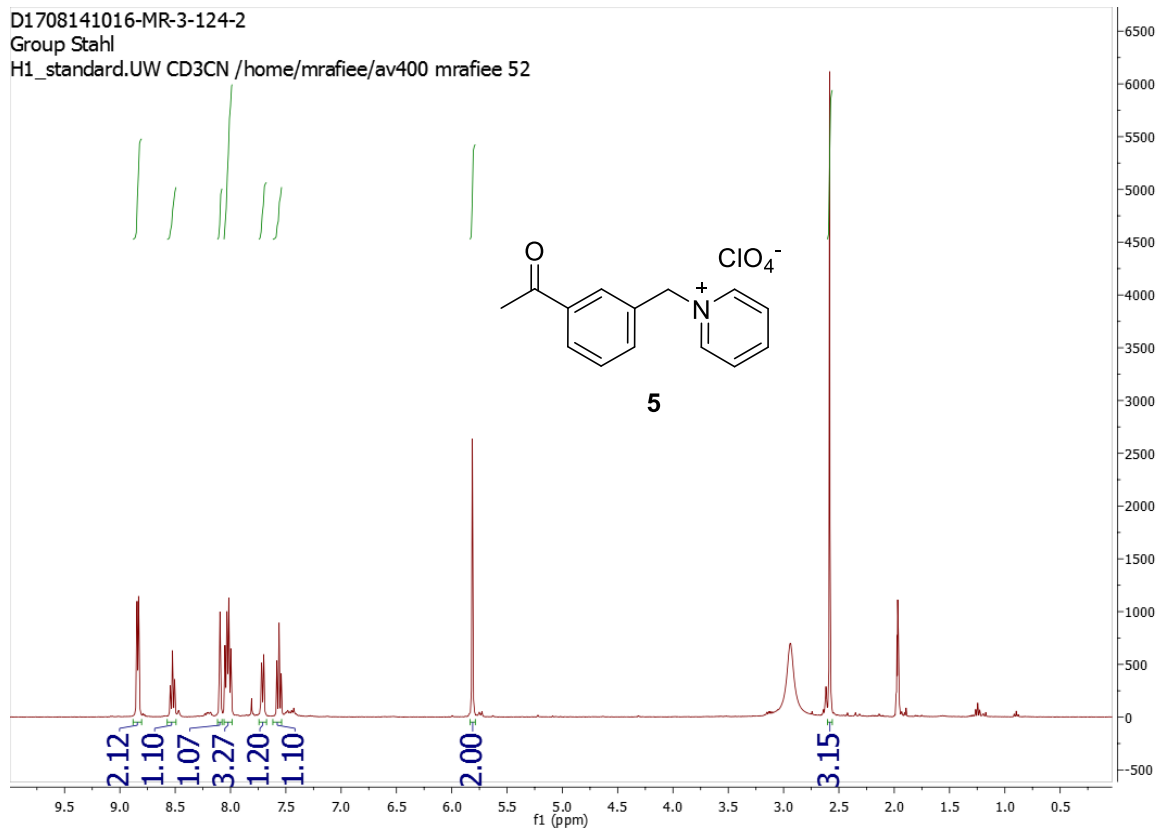

D1708141016-MR-3-124-2

Group Stahl

C13\_H1dec.UW CD3CN /home/mrafee/av400 mrafee 52

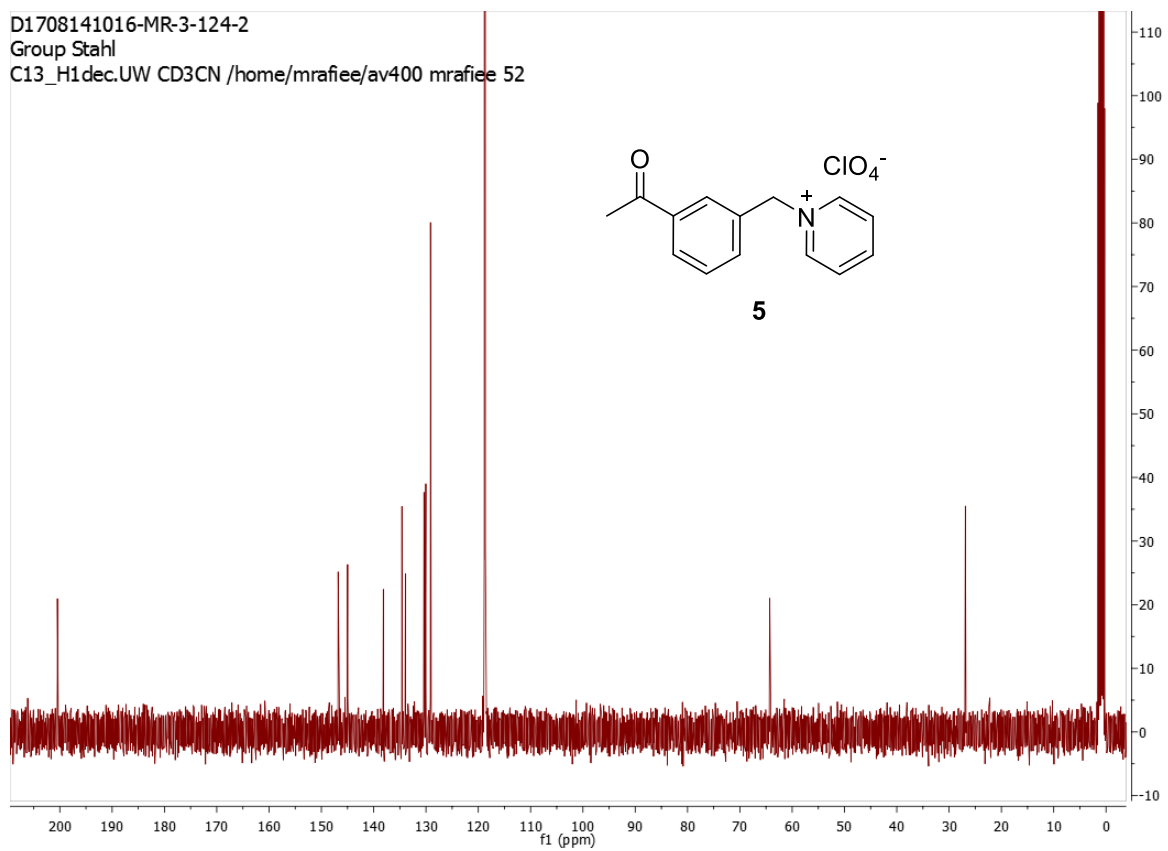

D1704271526-MR-3-116-1

Group Stahl

H1\_standard.UW CD3CN /home/mrafee/av400 mrafee 76

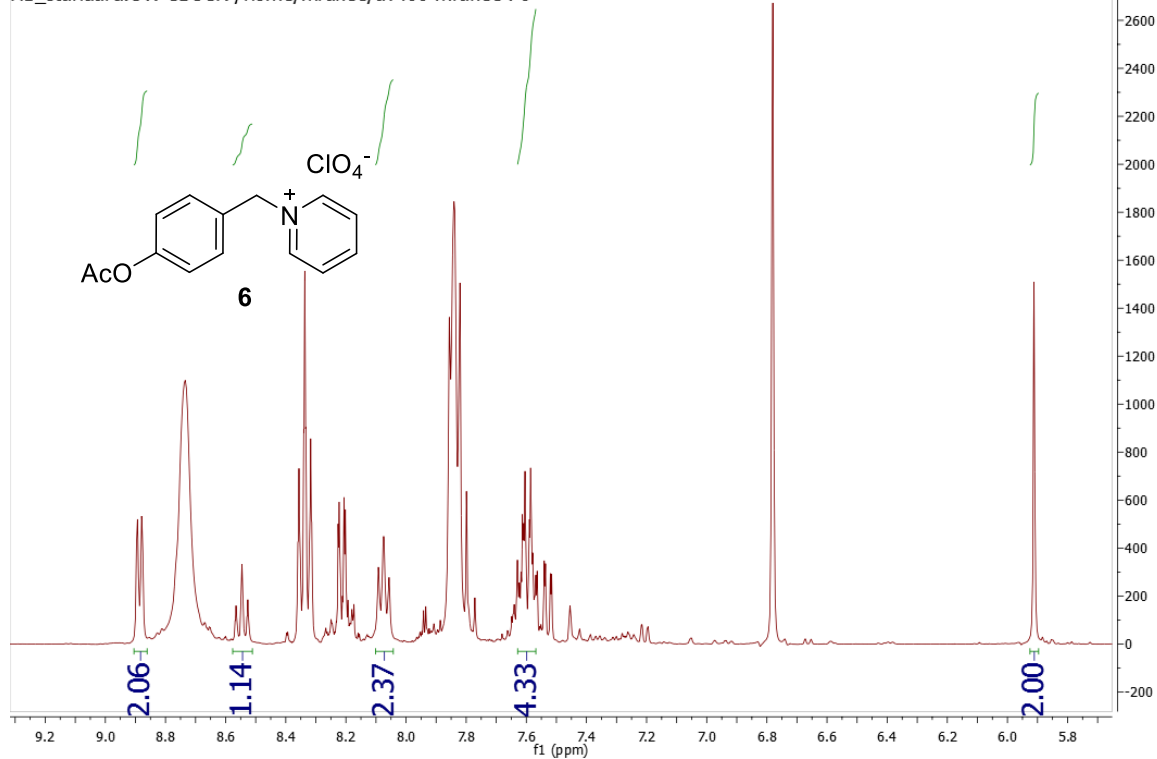

D1708141016-MR-3-124-3

Group Stahl

H1\_standard.UW CD3CN /home/mrafee/av400 mrafee 53

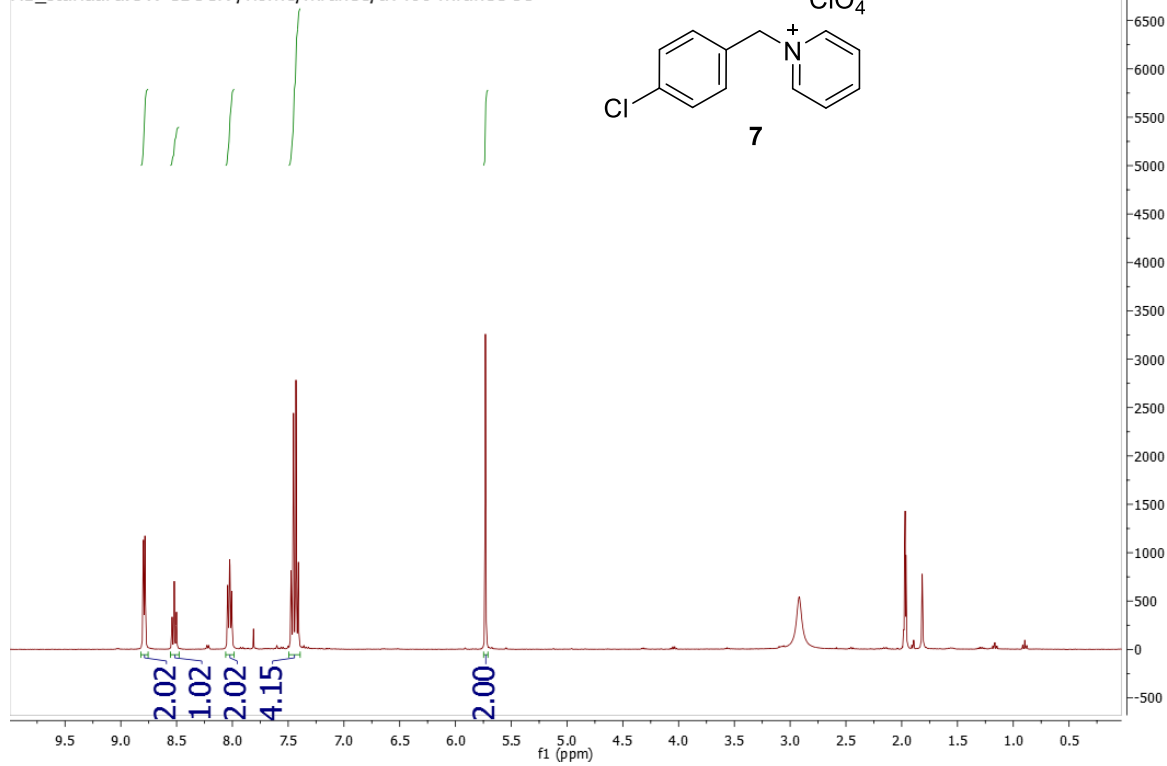

D1708141016-MR-3-124-3  
Group Stahl  
C13\_H1dec.UW CD3CN /home/mrafee/av400 mrafee 53

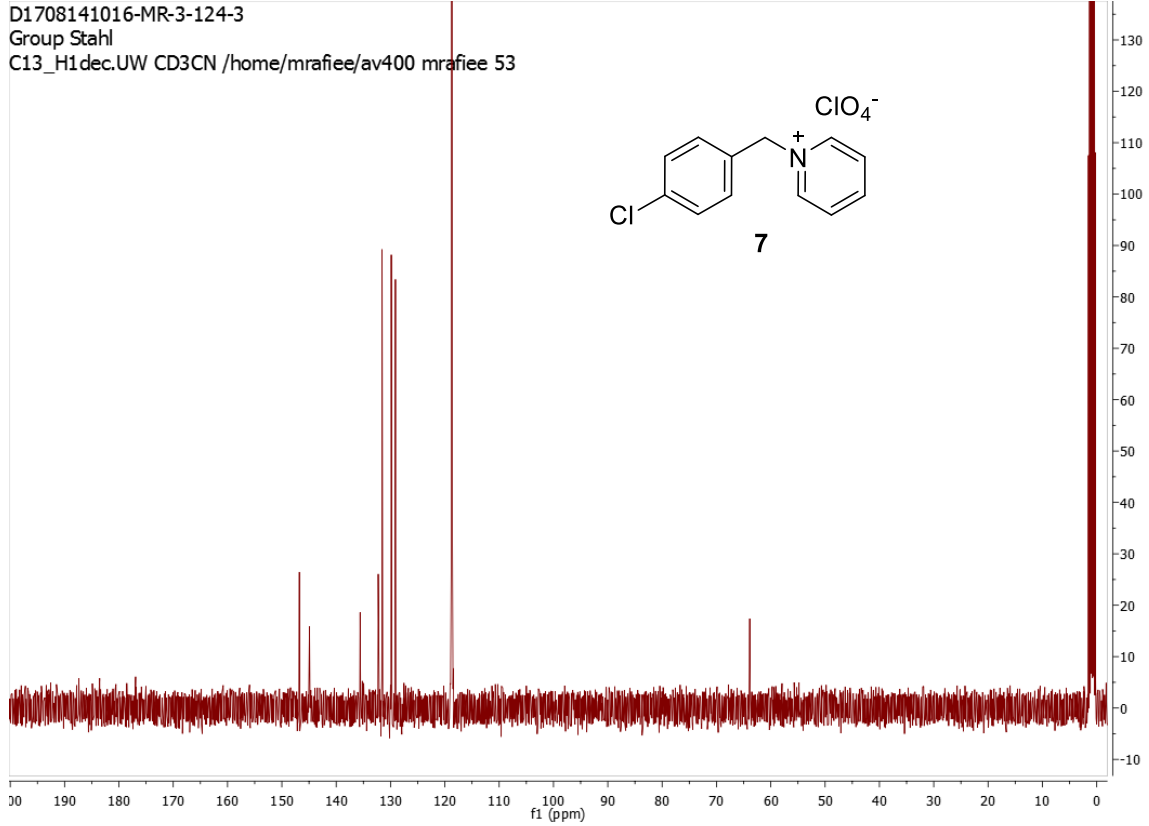

D1705170956-MR-3-100-1  
Group Stahl  
H1\_standard.UW CD3CN /home/mrafee/av400 mrafee 34

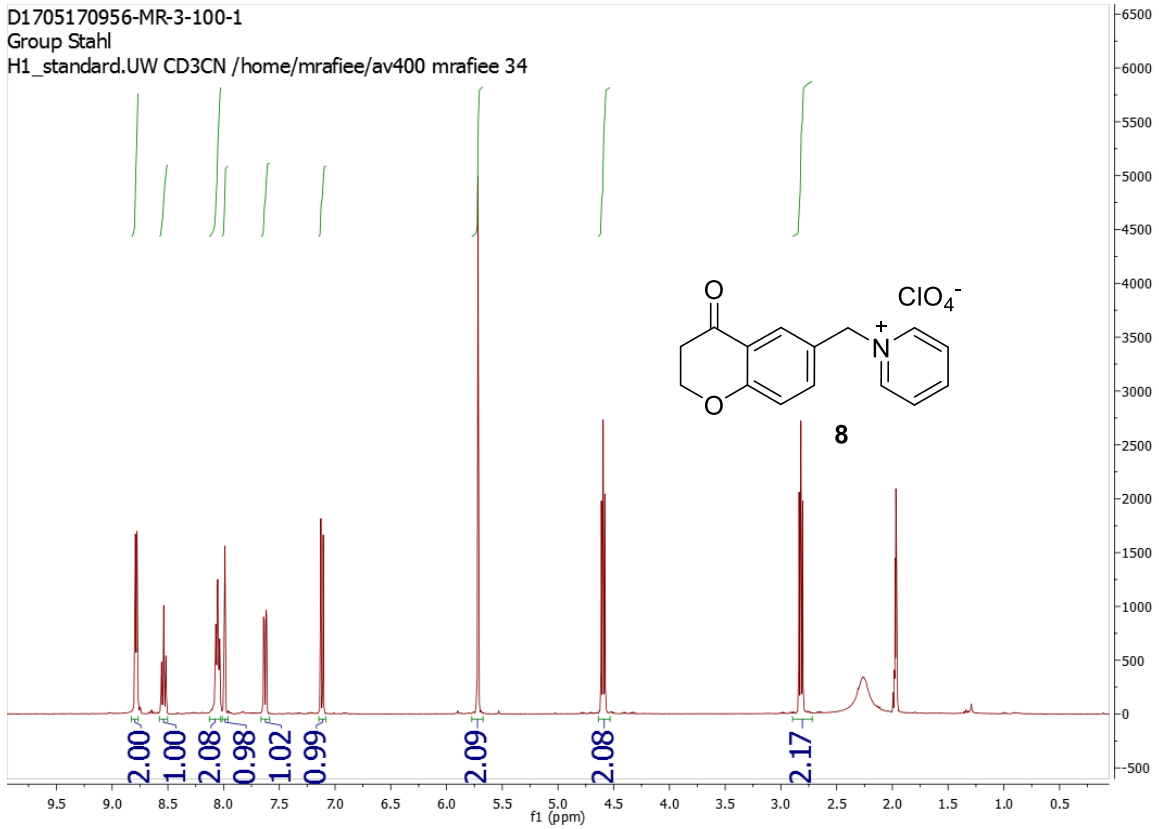

D1705170956-MR-3-100-1  
Group Stahl  
C13\_H1dec.UW CD3CN /home/mrafee/av400 mrafee 34

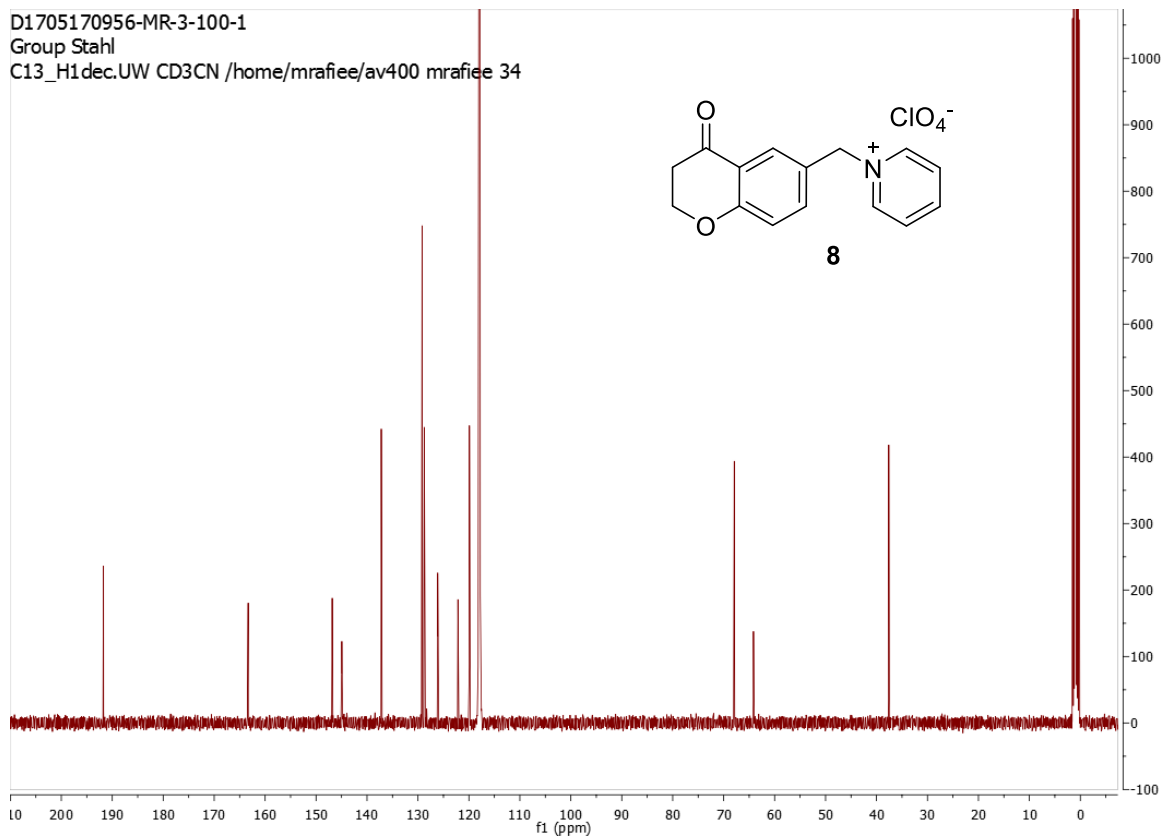

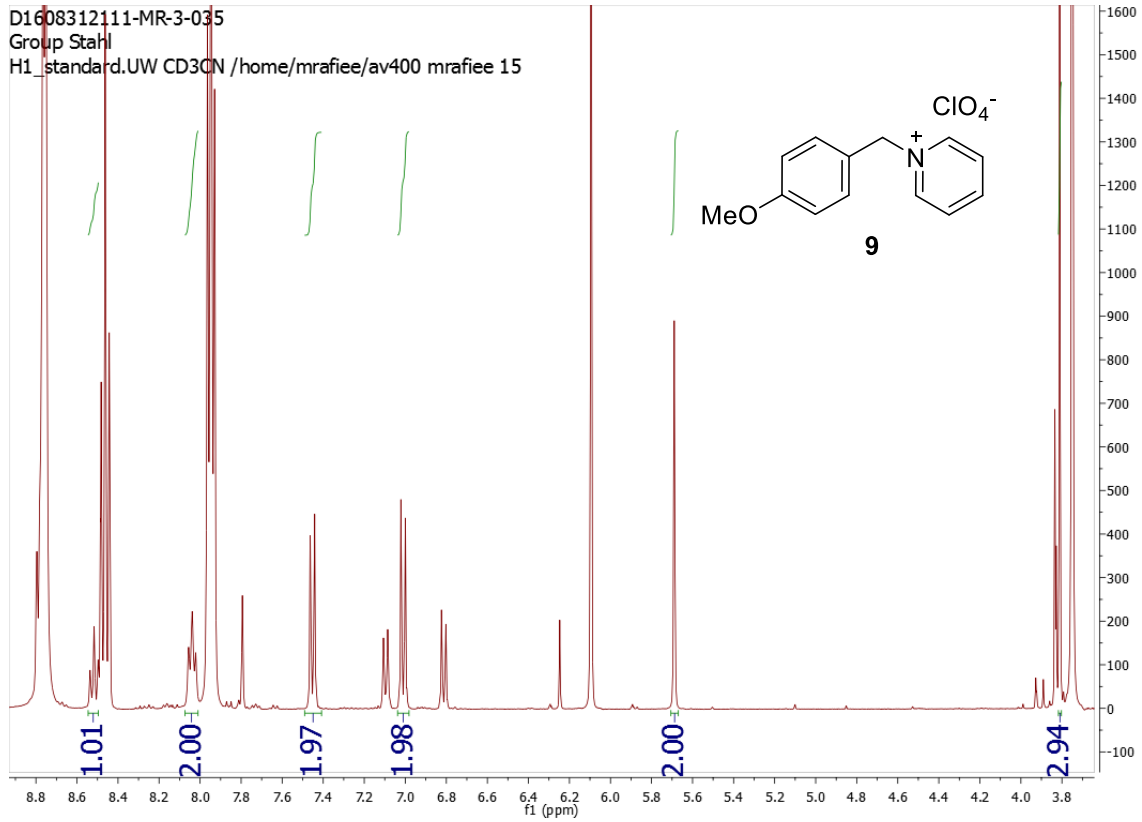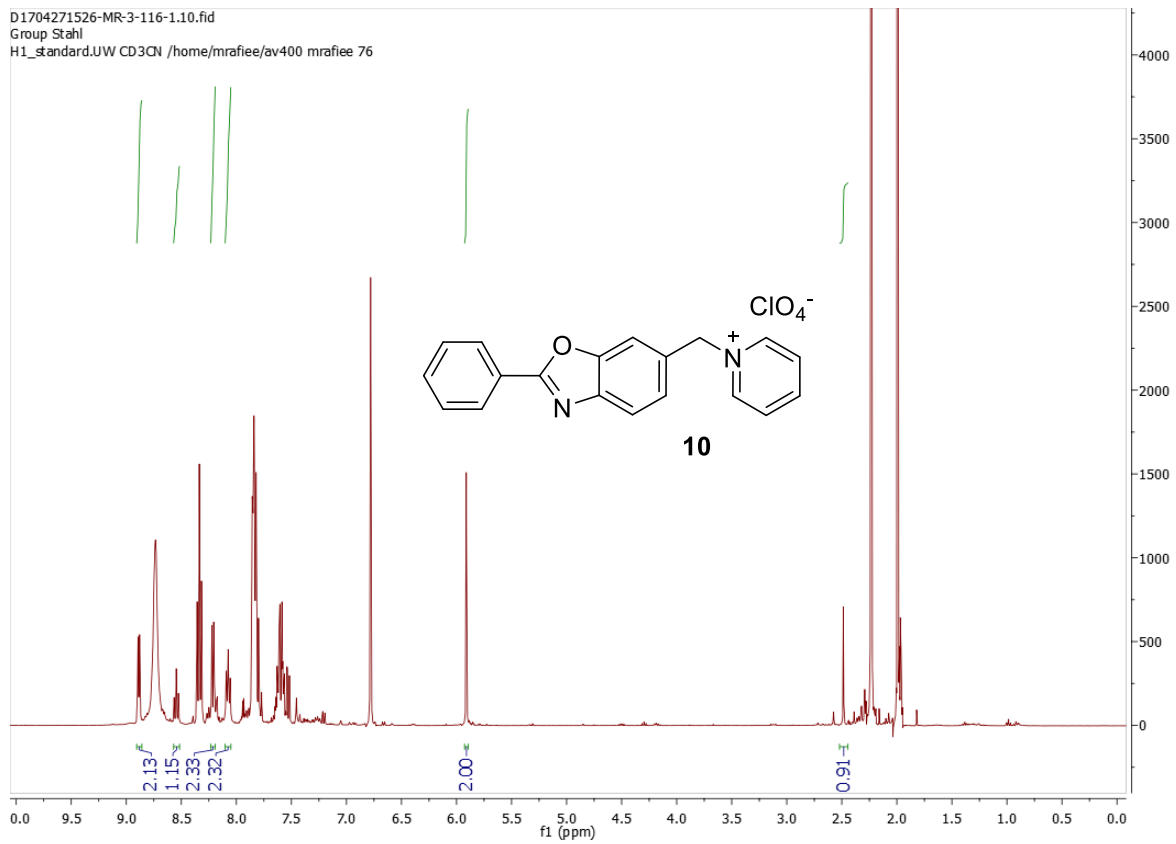

D1704260919-WF-1-081-P-H  
Group Stahl  
H1\_standard.UW CDCl3 /home/fwang235/av400 fwang235 50

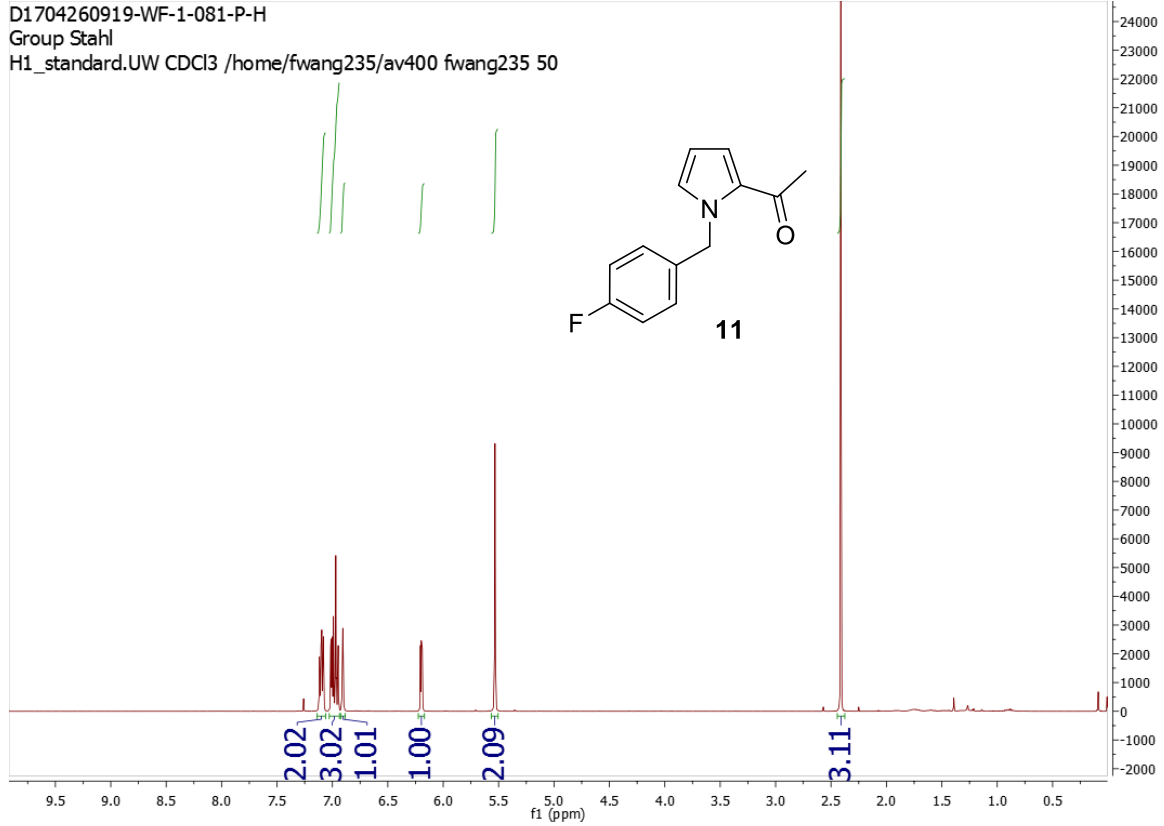

D1704260919-WF-1-081-P-C  
Group Stahl  
C13\_H1dec.UW CDCl3 /home/fwang235/av400 fwang235 50

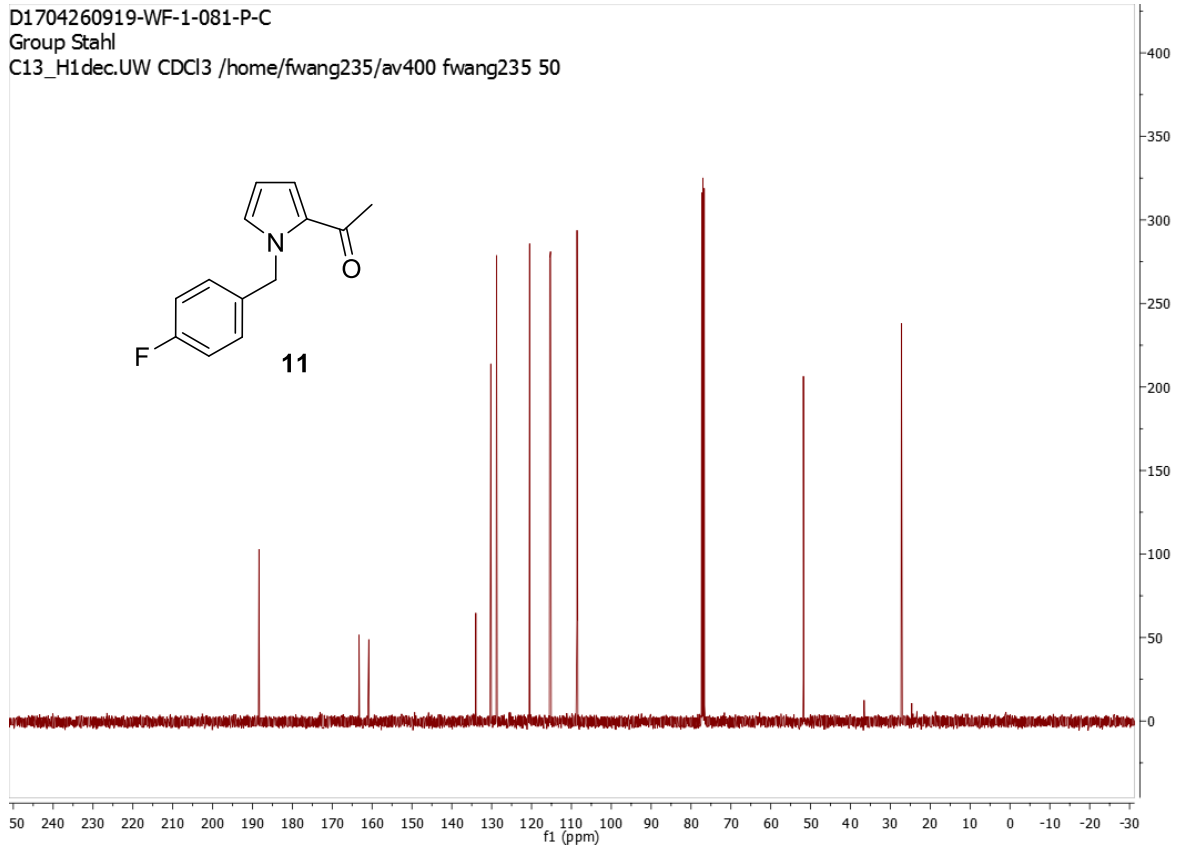

D1704260919-WF-1-081-P-F  
Group Stahl  
F19\_H1decoupled.UW CDCl3 /home/fwang235/av400 fwang235 50

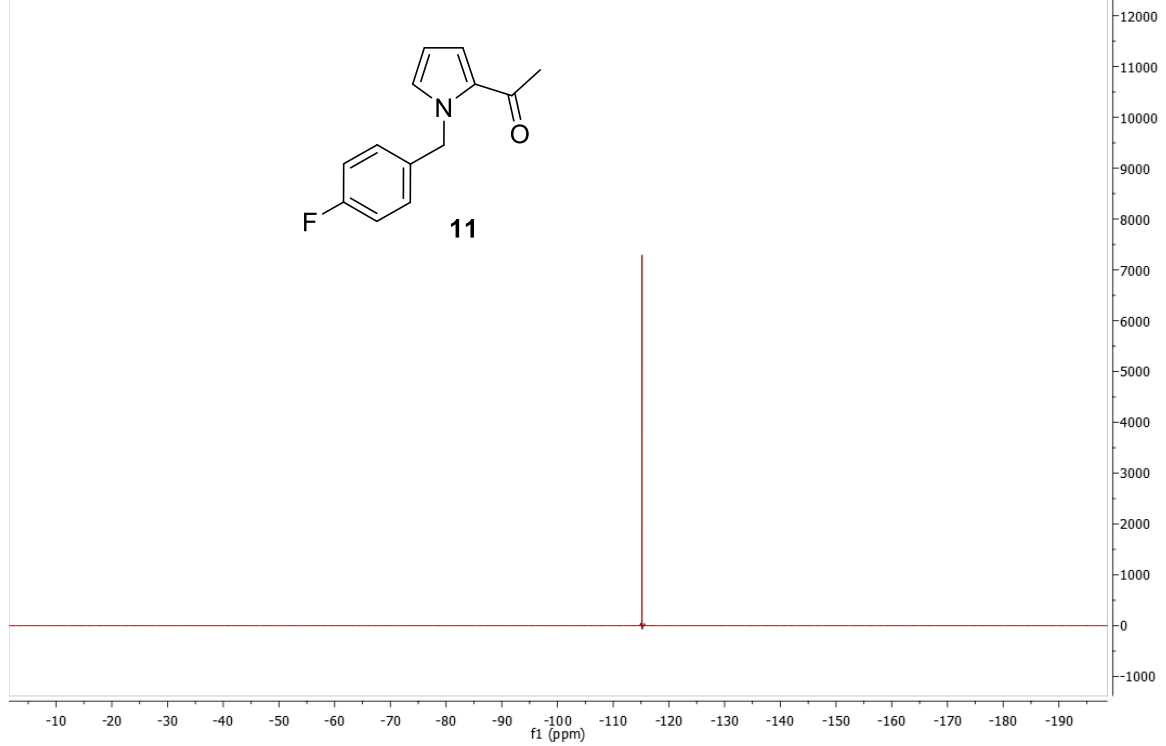

D1704261910-WF-1-co bond formation-1-h  
Group Stahl  
H1\_standard.UW CDCl3 /home/fwang235/av400 fwang235 4

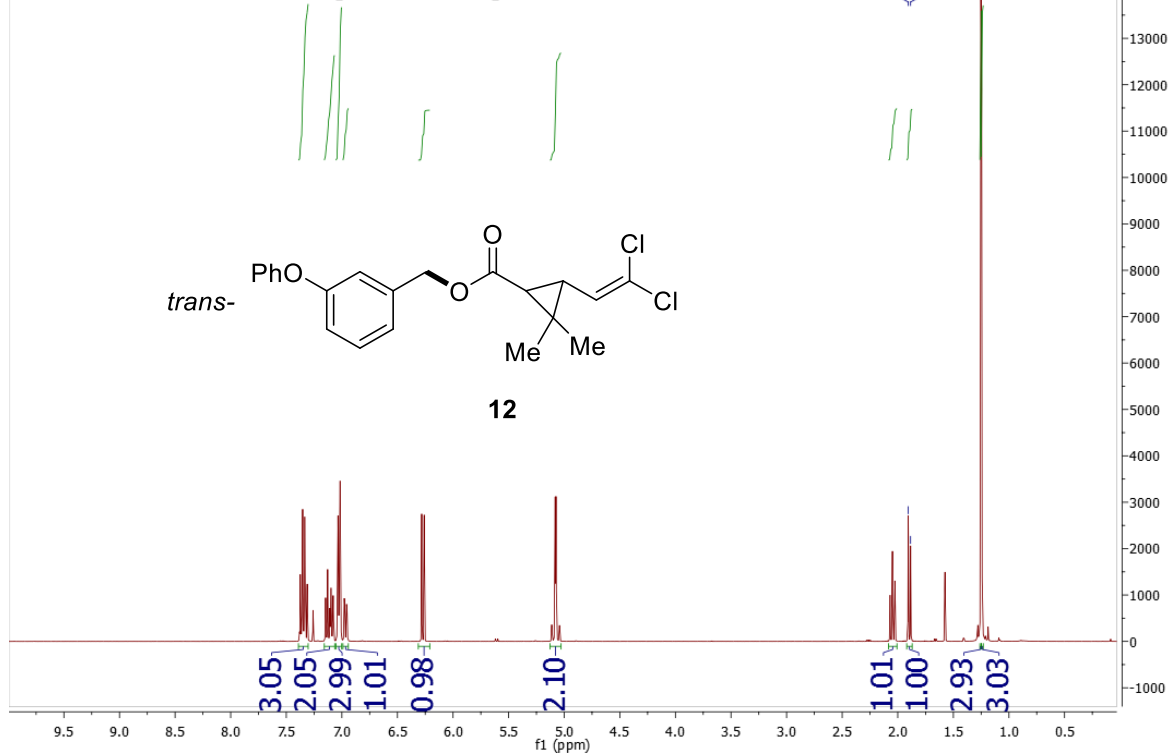



D1704261910-WF-1-co bond formation-1-c  
Group Stahl  
C13\_H1dec.UW CDCl3 /home/fwang235/av400 fwang235 4

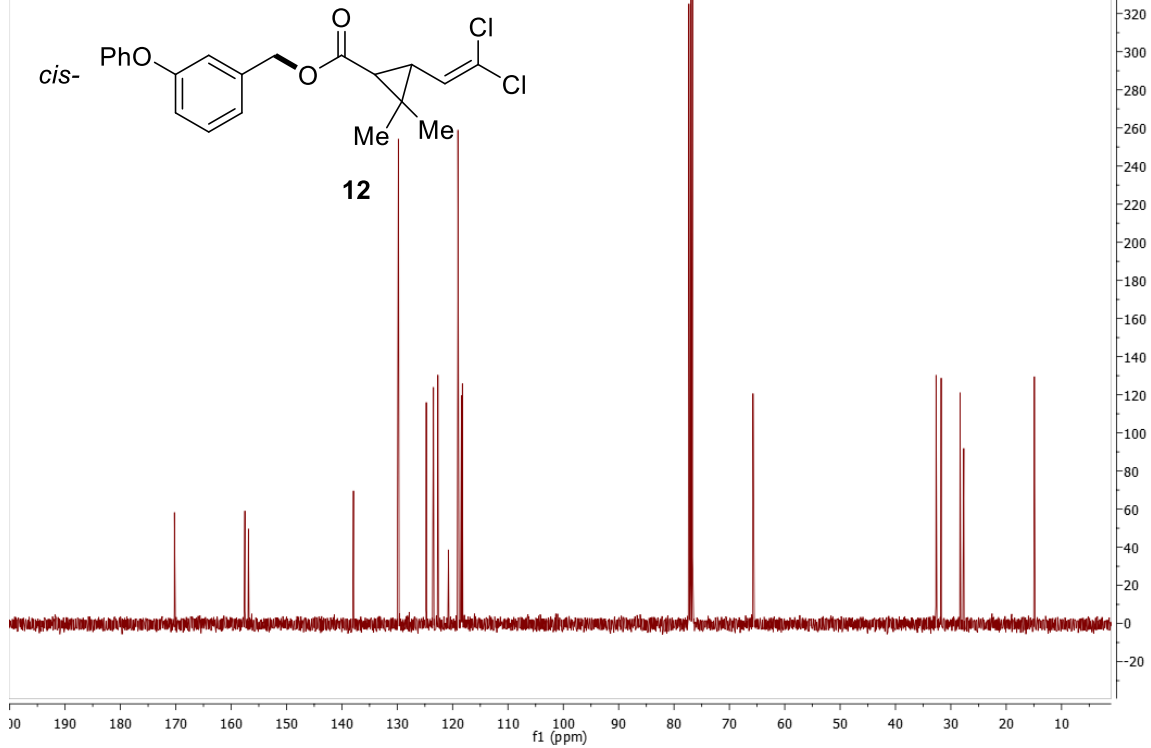

D1704261911-WF-1-co bond formation-2-h  
Group Stahl  
H1\_standard.UW CDCl3 /home/fwang235/av400 fwang235 5

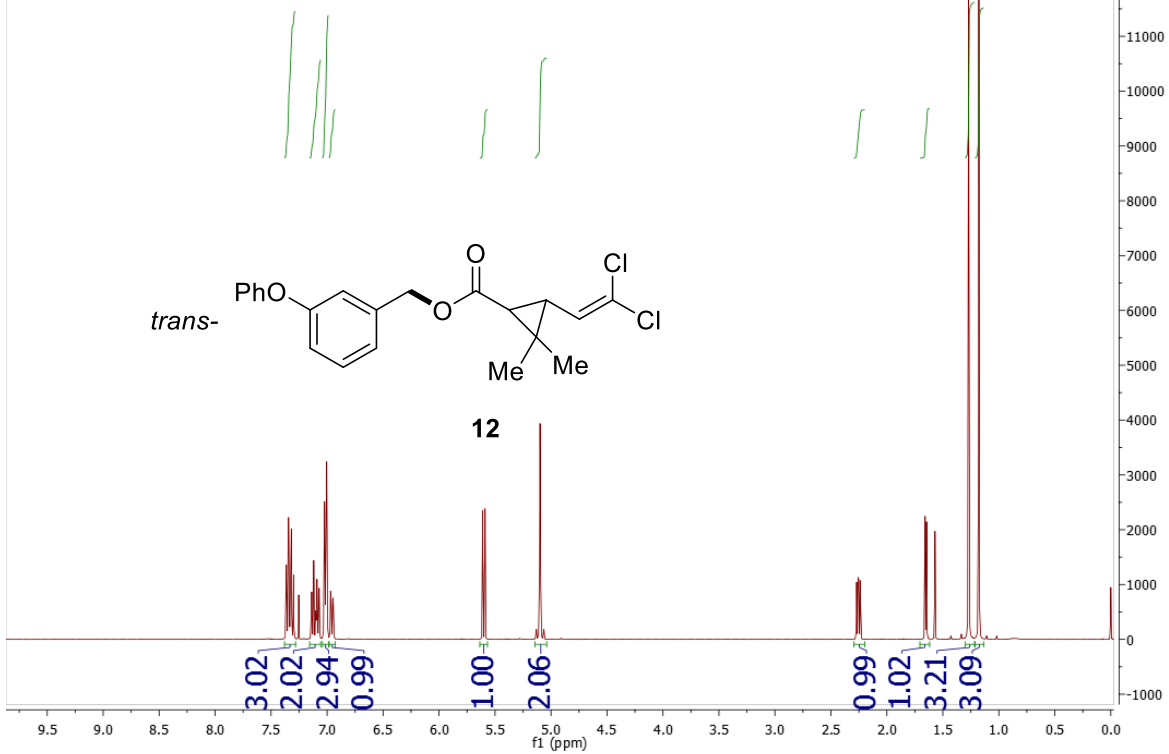

D1704261911-WF-1-co bond formation-2-c  
Group Stahl  
C13\_H1dec.UW CDCl3 /home/fwang235/av400 fwang235 5

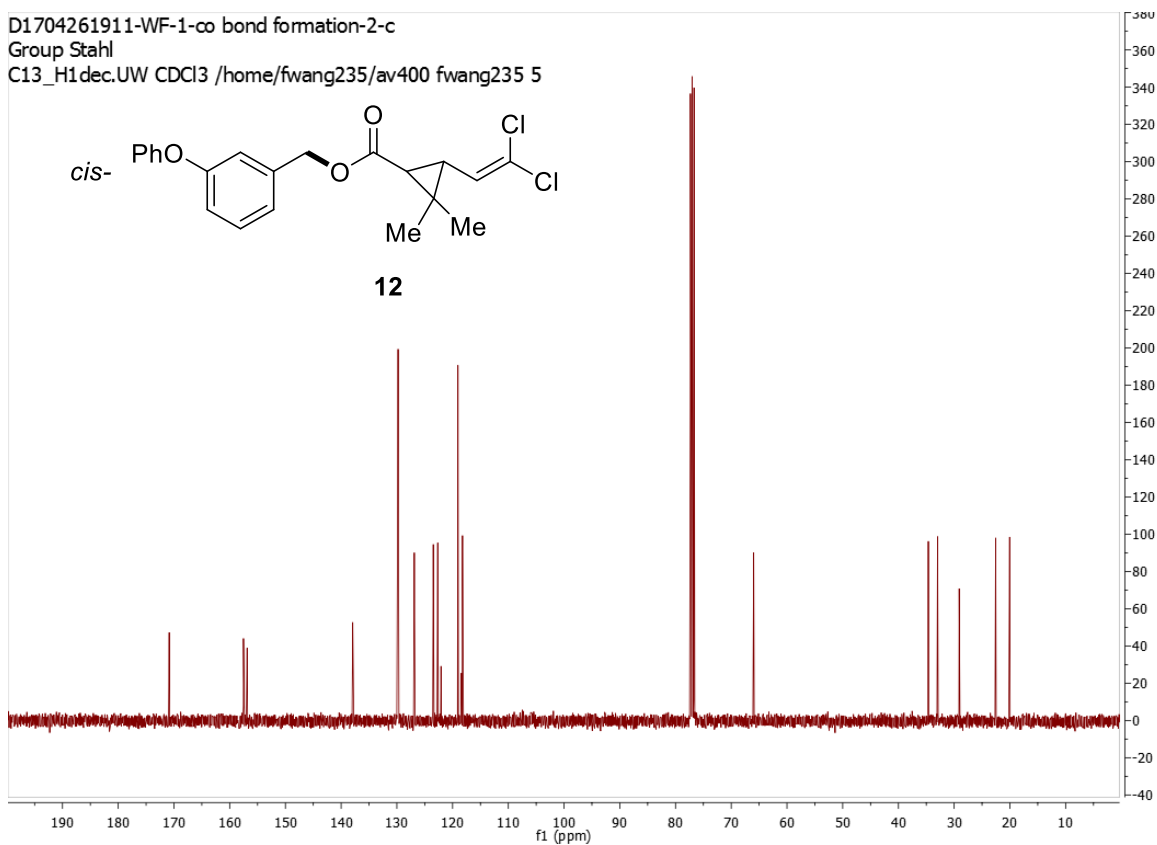

D1704261909-WF-1-cc bond formation-2-h  
Group Stahl  
H1\_standard.UW CDCl3 /home/fwang235/av400 fwang235 3

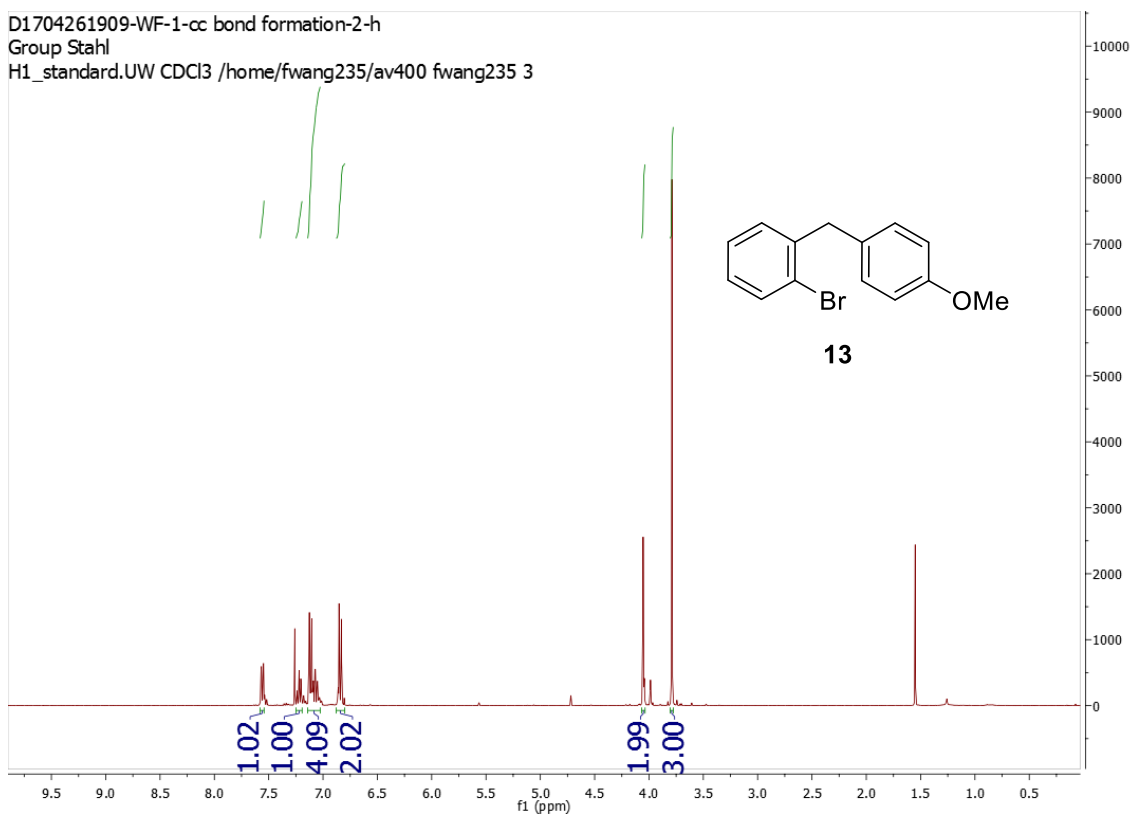

D1704261909-WF-1-cc bond formation-2-c  
Group Stahl  
C13\_H1dec.UW CDCl3 /home/fwang235/av400 fwang235 3

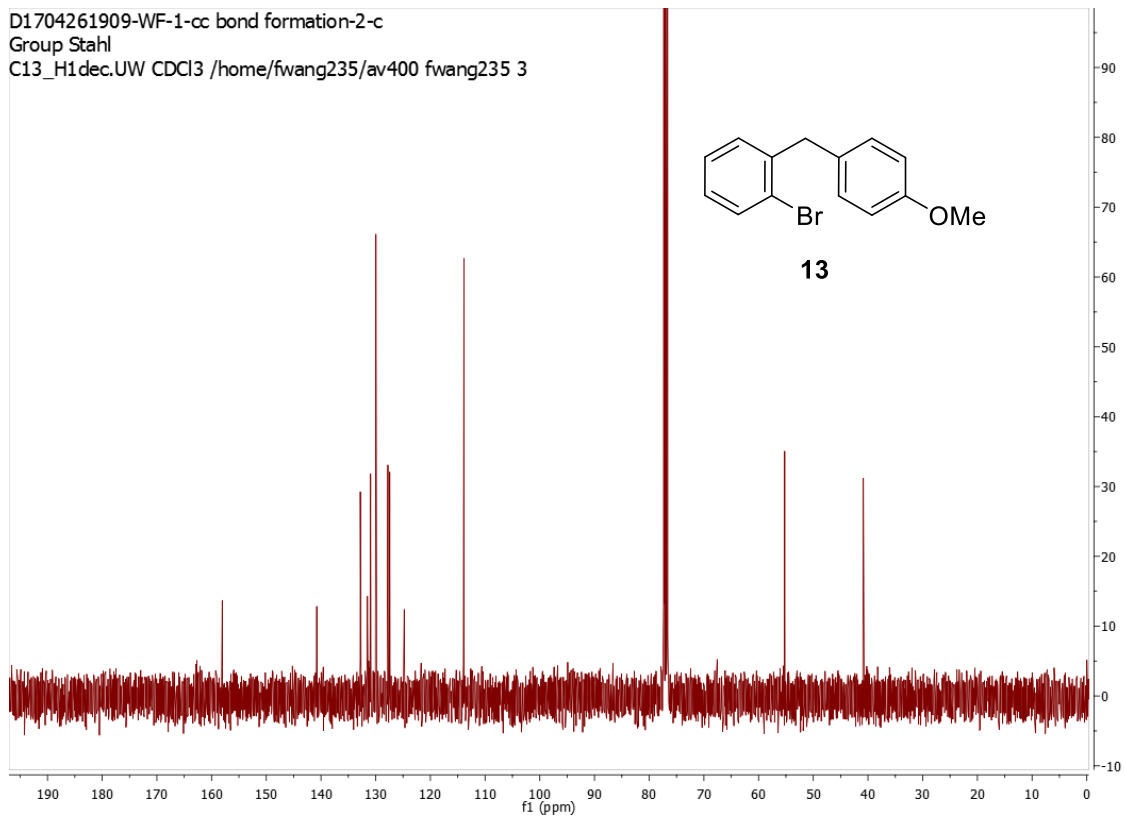

## 10. References

---

1. Ohmori, H.; Takanami, T.; Shimada, H.; Masui, M. *Chem. Pharm. Bull.* **1987**, *35*, 2558.
2. Sasaki, K.; Newby, W. J. *J. Electroanal. Chem. Interfacial Electrochem.* **1969**, *20*, 137.
3. Brinkhaus, K.-H. G.; Steckhan, E.; Degner, D. *Tetrahedron* **1986**, *42*, 553.
4. Tajik, H.; Shirini, F.; Zolfigol, M. A.; Samimi, F. *Synth. Commun.* **2006**, *36*, 91.
5. Hosseinzadeh, R.; Tajbakhsh, M.; Lasemi, Z.; Sharifi, A. *Bull. Korean Chem. Soc.* **2004**, *25*, 1143.
6. Neuhaus, P.; Henkel, S.; Sander, W. *Aust. J. Chem.* **2010**, *63*, 1634.
7. Ruso, J. S.; Rajendiran, N.; Kumaran, R. S. *J. Korean Chem. Soc.* **2014**, *58*, 39.
8. Stoner, E. J.; Cothron, D. A.; Balmer, M. K.; Roden, B. A. *Tetrahedron* **1995**, *51*, 11043.
9. Moriya, T.; Yoneda, S.; Kawana, K.; Ikeda, R.; Konakahara, T.; Sakai, N. *J. Org. Chem.* **2013**, *78*, 10642.
10. Katritzky, A. R.; Bapat, J. B.; Blade, R. J.; Leddy, B. P.; Nie, P.-L.; Ramsden, C. A.; Thind, S. S. *J. Chem. Soc., Perkin Trans. 1*, **1979**, 418.
11. Rozwadowska, M. D.; Wysocka, W. *Pol. J. Chem.* **1982**, *56*, 533.
12. Sechi, M.; Bacchi, A.; Carcelli, M.; Compari, C.; Duce, E.; Fisicaro, E.; Rogolino, D.; Gates, P.; Derudas, M.; Al-Mawsawi, L. Q.; Neamati, N. *J. Med. Chem.* **2006**, *49*, 4248.
13. Bicker, W.; Kacprzak, K.; Kwit, M.; Lämmerhofer, M.; Gawronski, J.; Lindner, W. *Tetrahedron: Asymmetry* **2009**, *20*, 1027.
14. Corrie, T. J. A.; Ball, L. T.; Russell, C. A.; Lloyd-Jones, G. C. *J. Am. Chem. Soc.* **2017**, *139*, 245.
